# Supplementary material for: Haplotype-based pangenomes reveal genetic variations and climate adaptations in moso bamboo populations
Source: Springer Nature journal article supplement (doi:10.1038/s41467-024-52376-5), 2024-09-15
Supplement: 41467_2024_52376_MOESM1_ESM.pdf [file 41467_2024_52376_MOESM1_ESM.pdf]

**Haplotype-based pangenomes reveal genetic variations and climate adaptations  
in moso bamboo populations**

**Hou *et al.***

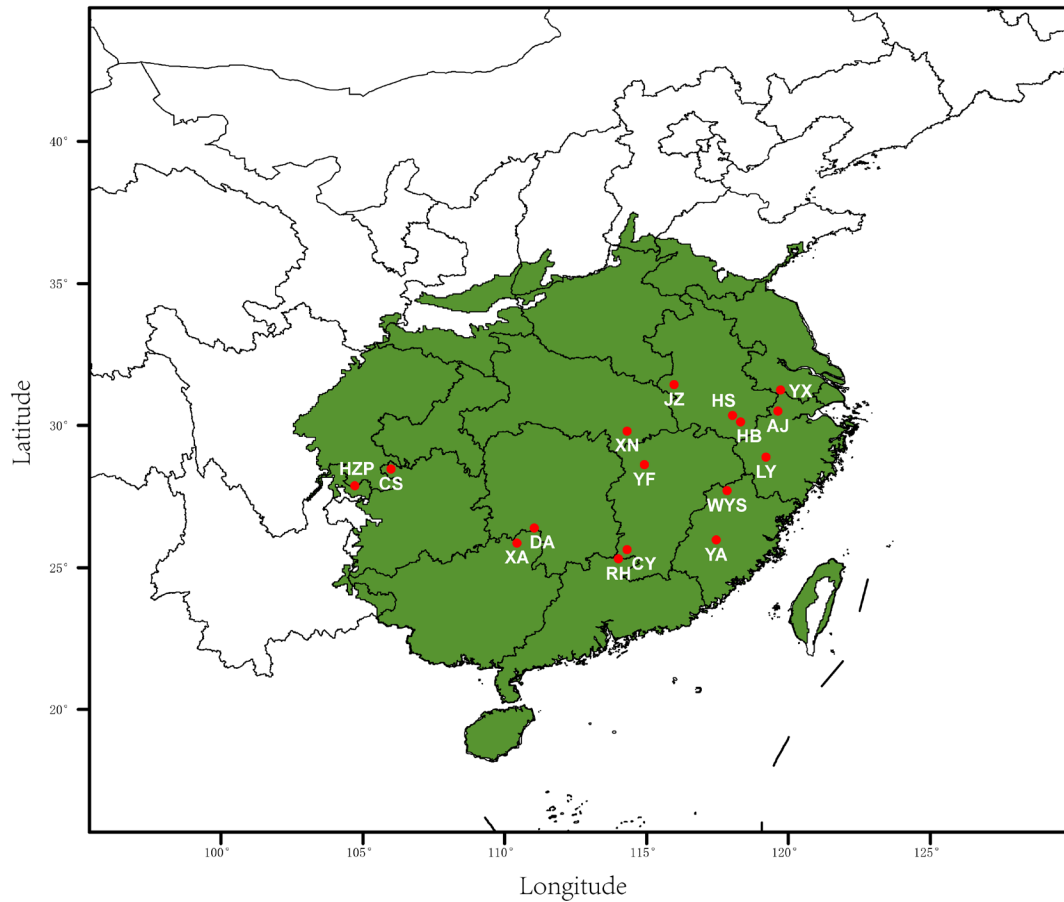

**Supplementary Fig. 1 Geographic locations of the 16 representative moso bamboo accessions across China.** The specific coordinates of each accession are denoted by red dots. The suitable habitat range of moso bamboo across China was delineated based on Global Biodiversity Information Facility (GBIF) data (green shaded area).

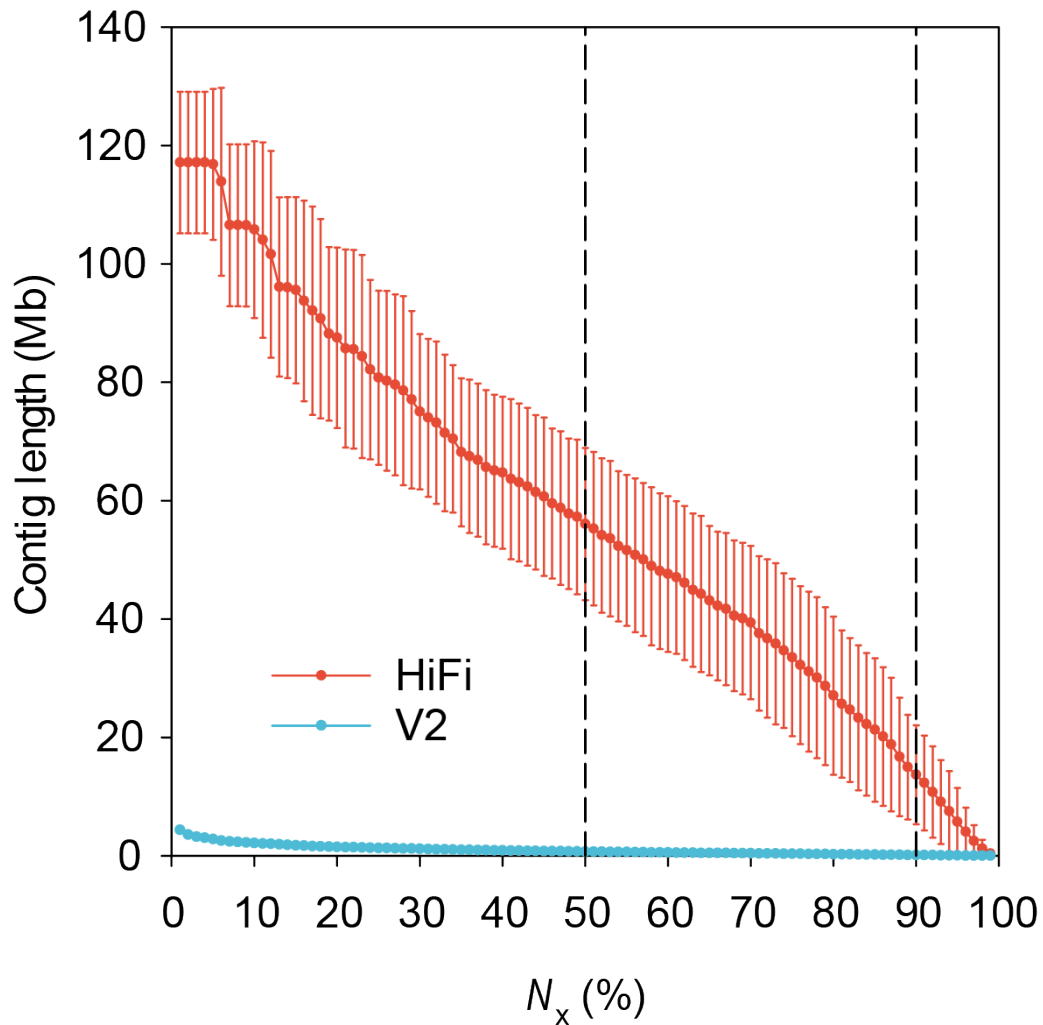

**Supplementary Fig. 2 Contig  $N_x$  sizes of all genome assemblies.** Contig  $N_x$  sizes are shown for the haplotype assemblies generated in this study (red) and the previously published assemblies (blue). The red line depicts the average contig  $N_x$  values across the genome assemblies of the 16 moso bamboo accessions sequenced with PacBio HiFi reads in this study. The blue line shows the contig  $N_x$  sizes for the earlier genome assemblies of a different set of moso bamboo accessions based on previous sequencing.

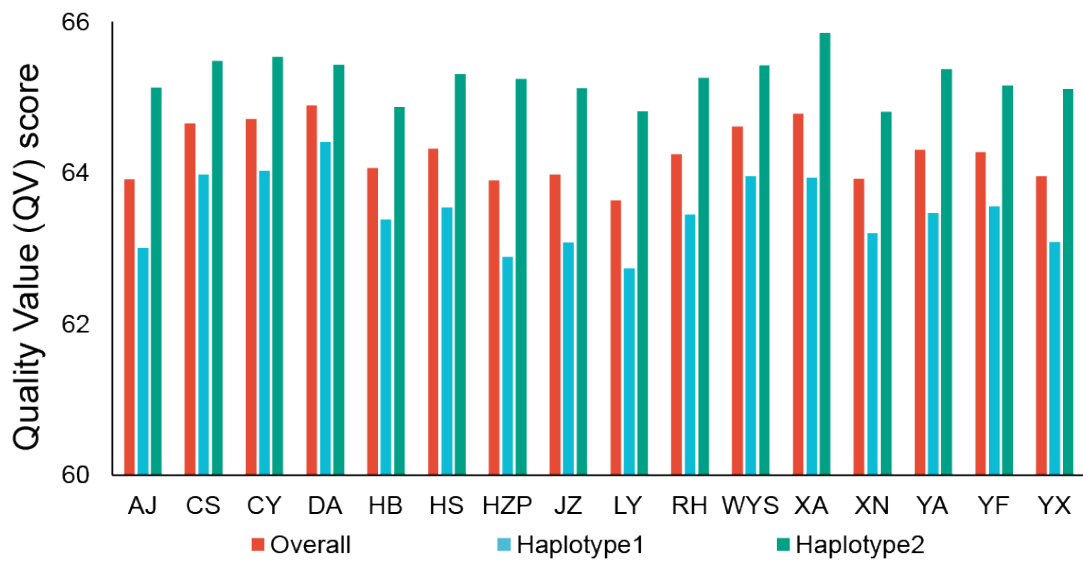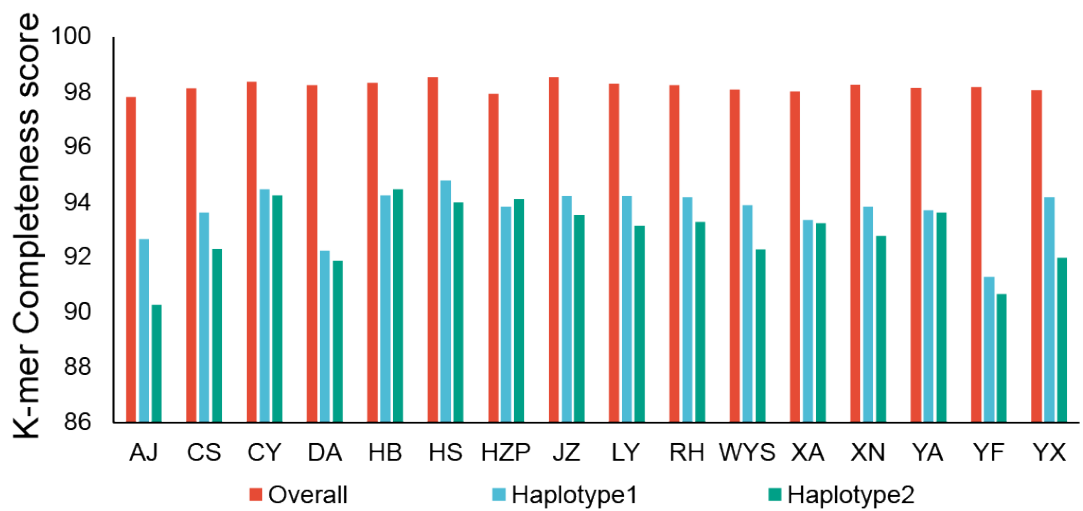

**Supplementary Fig. 3 K-mer assessment of the genome.** The top panel displays the average quality value (QV), and the bottom panel illustrates the k-mer completeness.

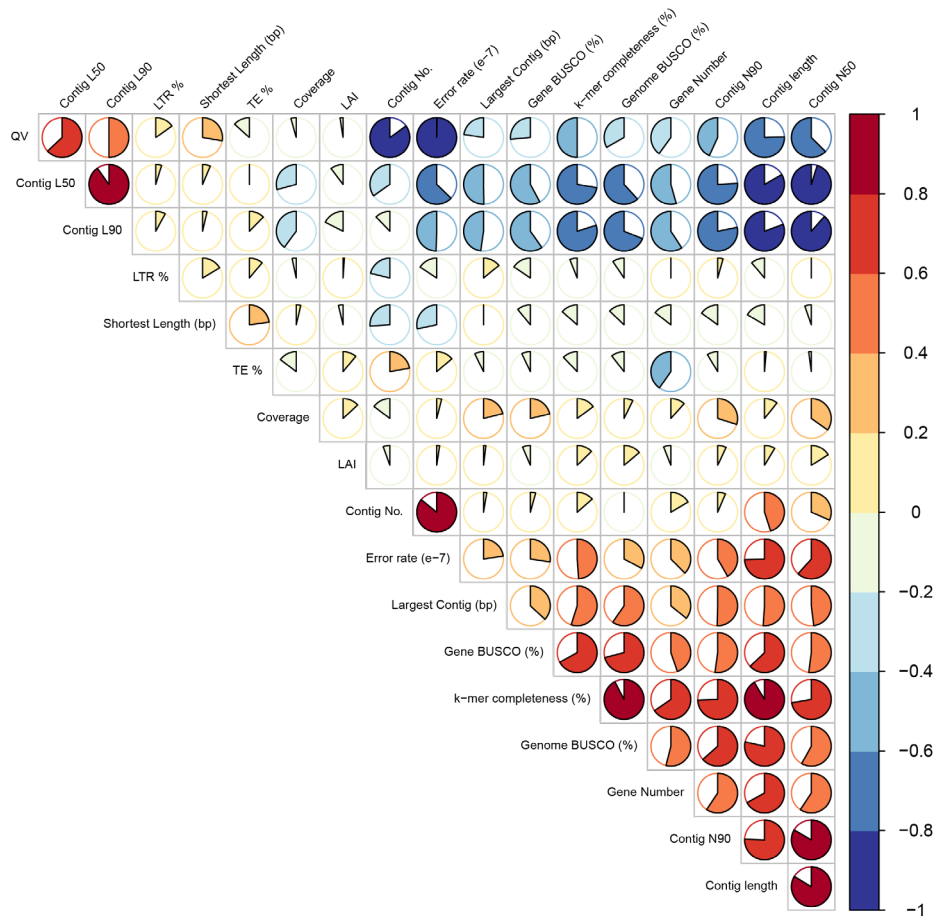

**Supplementary Fig. 4 Correlations between assembly quality evaluation metrics.**

We assessed the quality of the genomes mainly through 3 aspects—continuity, base accuracy, and structural accuracy—and conducted correlation analyses on their parameters. Red represents a positive correlation, blue represents a negative correlation, and darker colors indicate stronger correlations. The circle area represents the parameter value, with larger areas indicating larger parameter values.

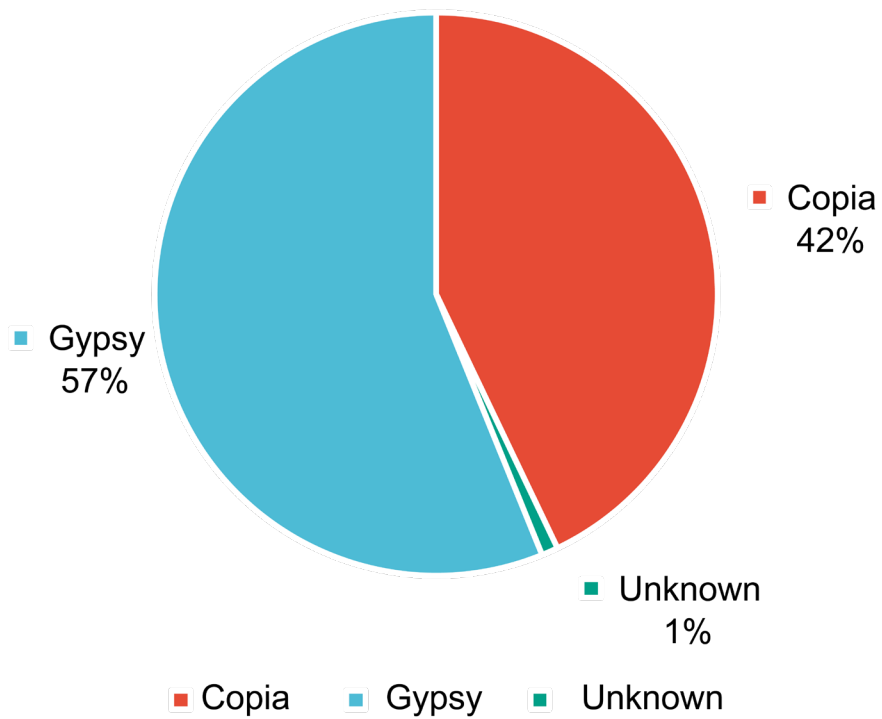

**Supplementary Fig. 5** Pie chart illustrating the relative abundances of different LTR retrotransposon families in the moso bamboo genome.

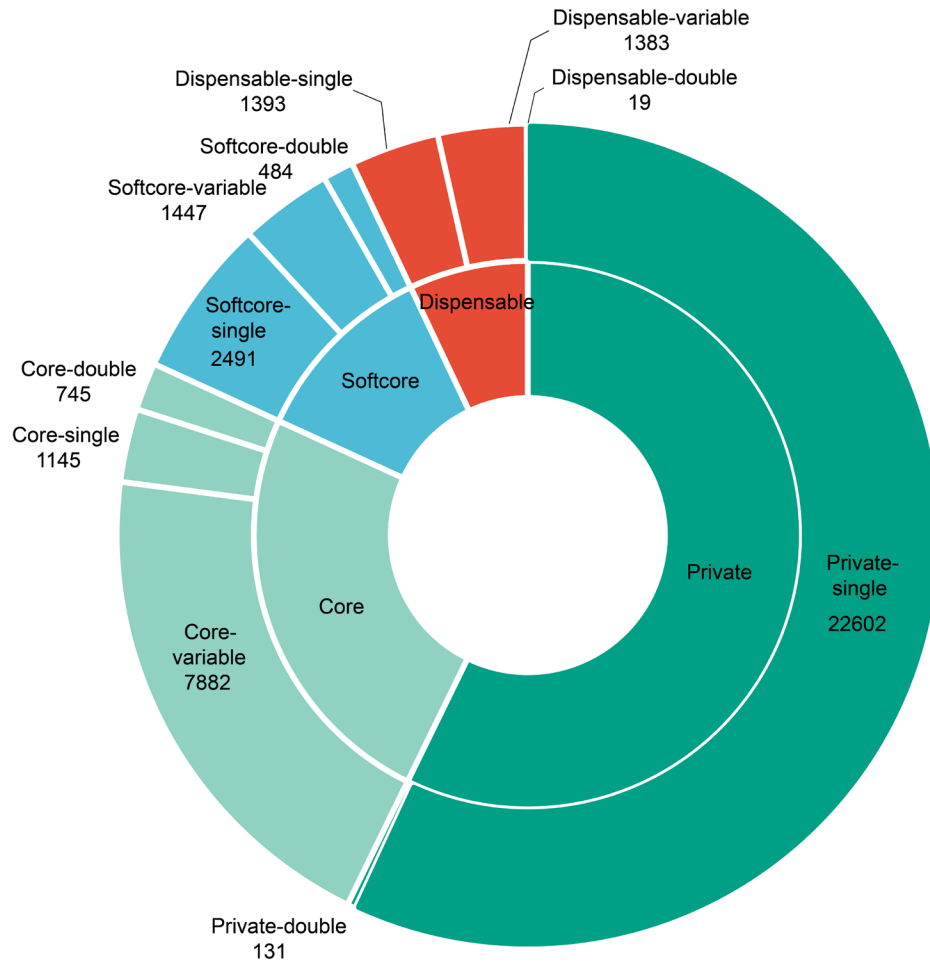

**Supplementary Fig. 6 Pie chart comparing LTR retrotransposon types between the two haplotypes within each moso bamboo genome.**

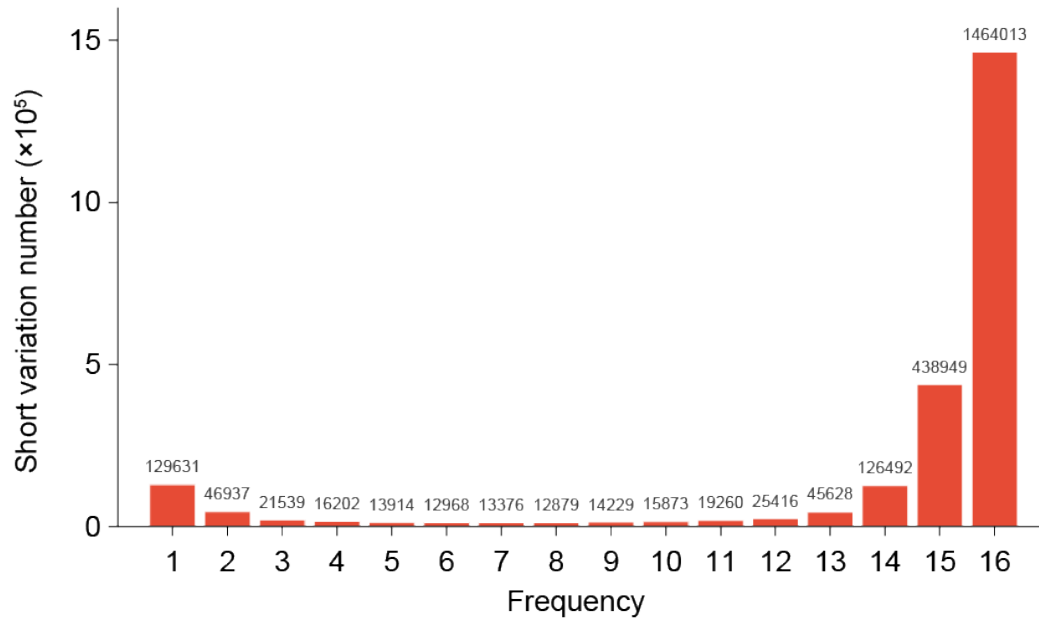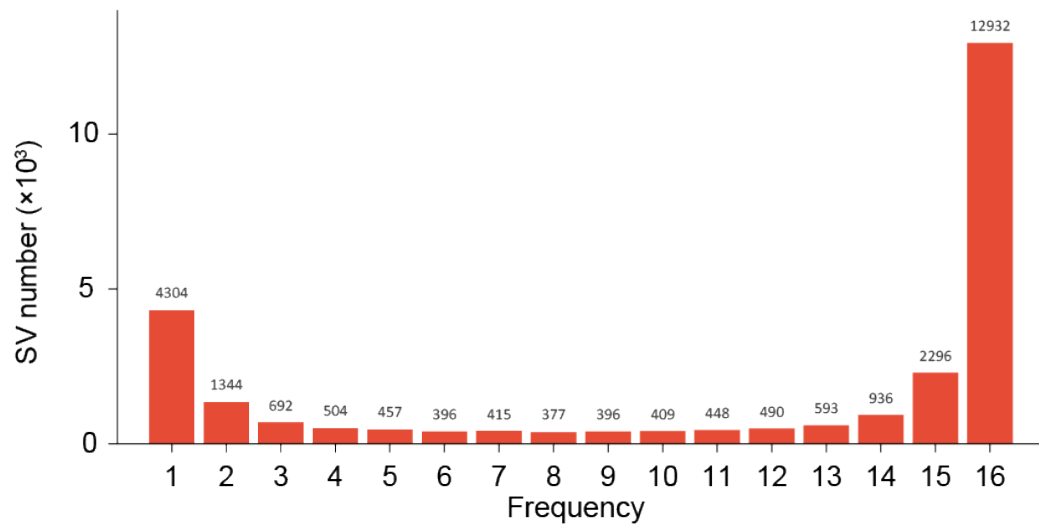

**Supplementary Fig. 7 Accession frequency distribution of short variations and SVs.** The x-axis represents the frequency of occurrence in different accessions. The upper plot shows the number of short variations, and the lower plot shows the number of SVs. In this study, short variations refer to SNPs and InDels.



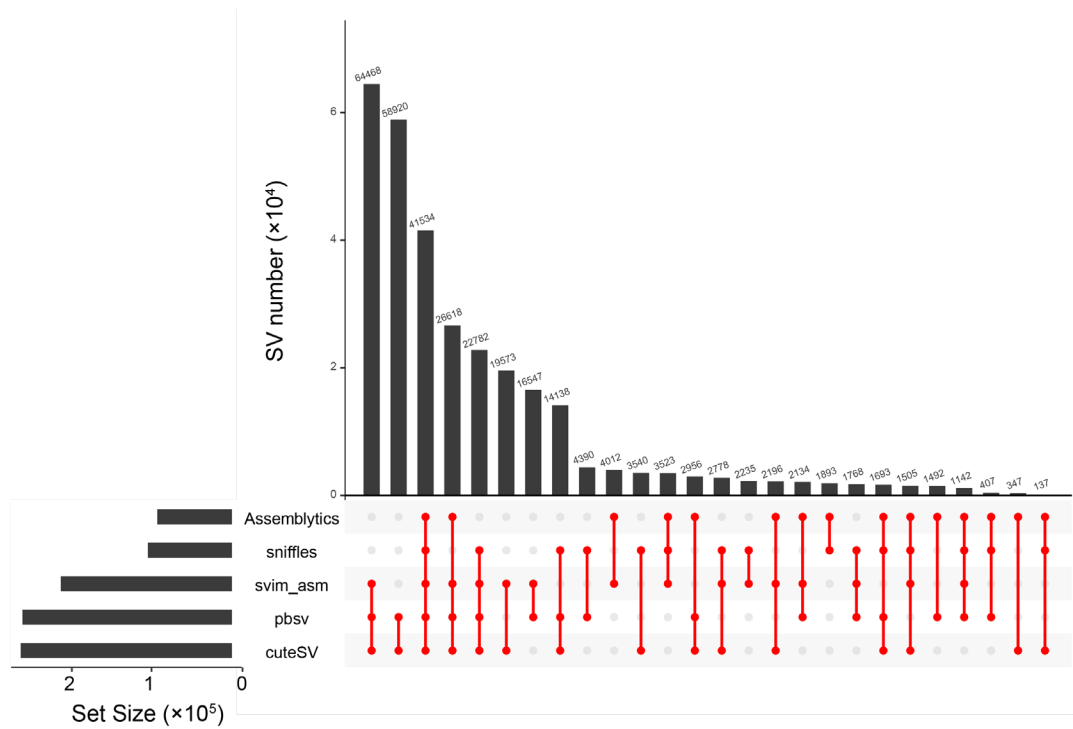

**Supplementary Fig. 8 Upset plot showing the number of SVs detected by different methods.** We used five SV callers (Assemblytics, sniffles, svim\_asm, pbsv, and cuteSV) based on two strategies (read alignment and whole-genome alignment). The upper bar chart shows the intersections of callers, with height indicating size. The lower left bar chart shows caller sets, with length indicating size. The matrix shows intersections containing sets via marks at corresponding row-column points. This revealed overlapping relationships between sets.

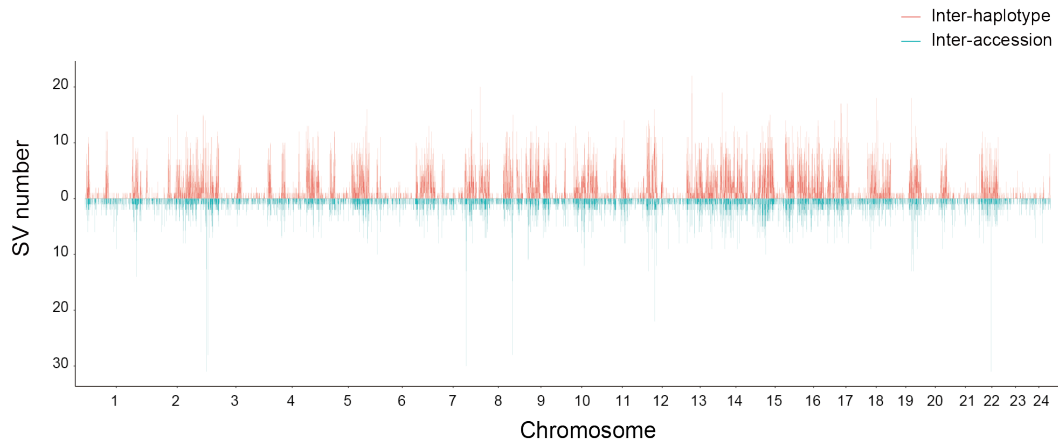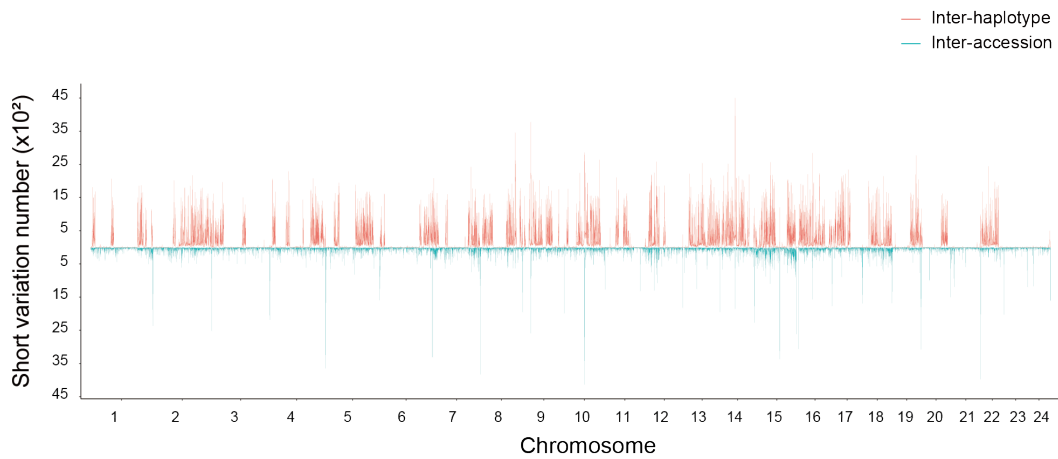

**Supplementary Fig. 9 Frequency distributions of both structural variations (SVs) and short variations (SNPs and InDels) across the moso bamboo genome.** The upper panel depicts the distribution of SVs, while the lower panel illustrates the distribution of short variations. The x-axis indicates the chromosome numbers, and the y-axis indicates the number of variations on each chromosome. The blue line represents the frequency of inter-accession variations, which are differences between individual moso bamboo accessions, while the red line represents the frequency of inter-haplotype variations, which are differences between the two haplotypes within each accession.

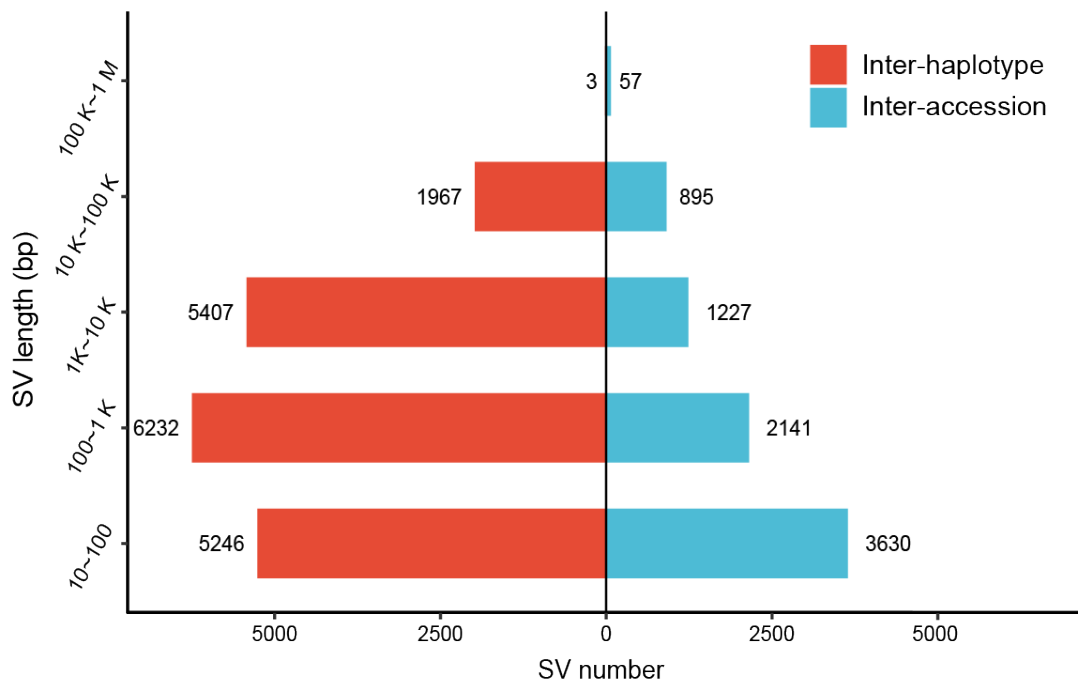

**Supplementary Fig. 10 Numbers of SVs in different length categories.** Based on different SV lengths (y-axis), red represents inter-haplotype SVs, and blue represents inter-accession SVs.

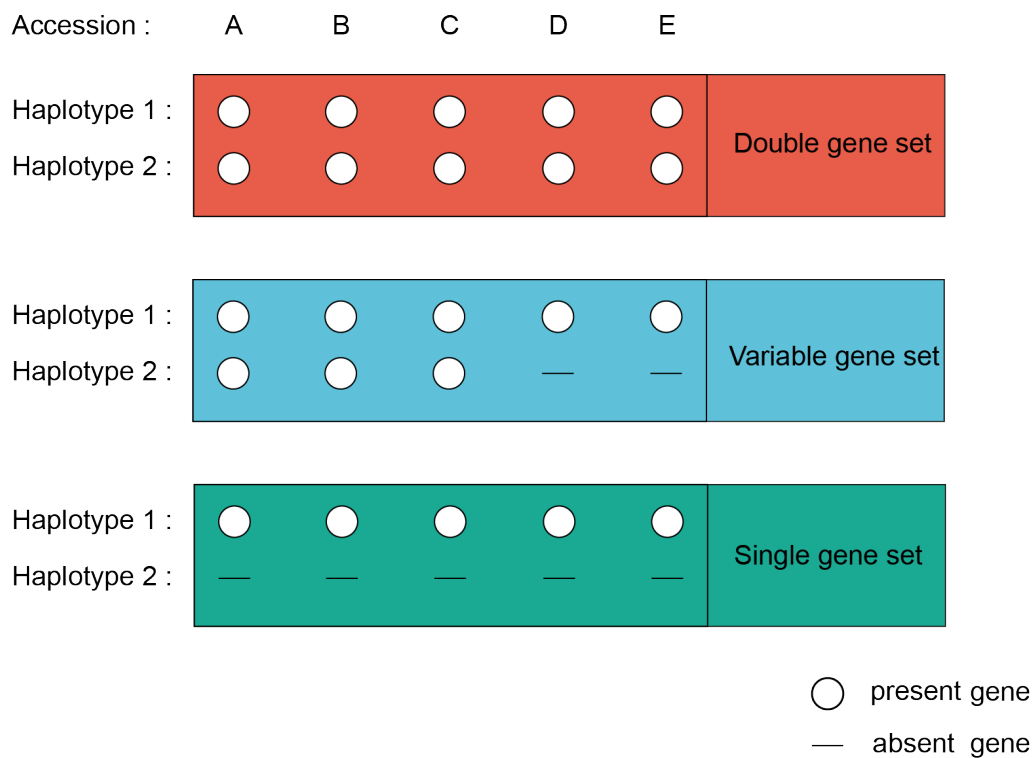

**Supplementary Fig. 11 Schematic diagram illustrating the classification based on alleles.** Gene sets were divided into three groups based on allele composition: double-allele gene sets (the allele was detected in paired haplotypes of all accessions), single-allele gene sets (the allele was detected in only one of the paired haplotypes of all accessions), and variable-allele gene sets (the allele was detected in paired haplotypes of some accessions). A–E represent accessions. A circle represents a present gene, while a horizontal line represents an absent gene.

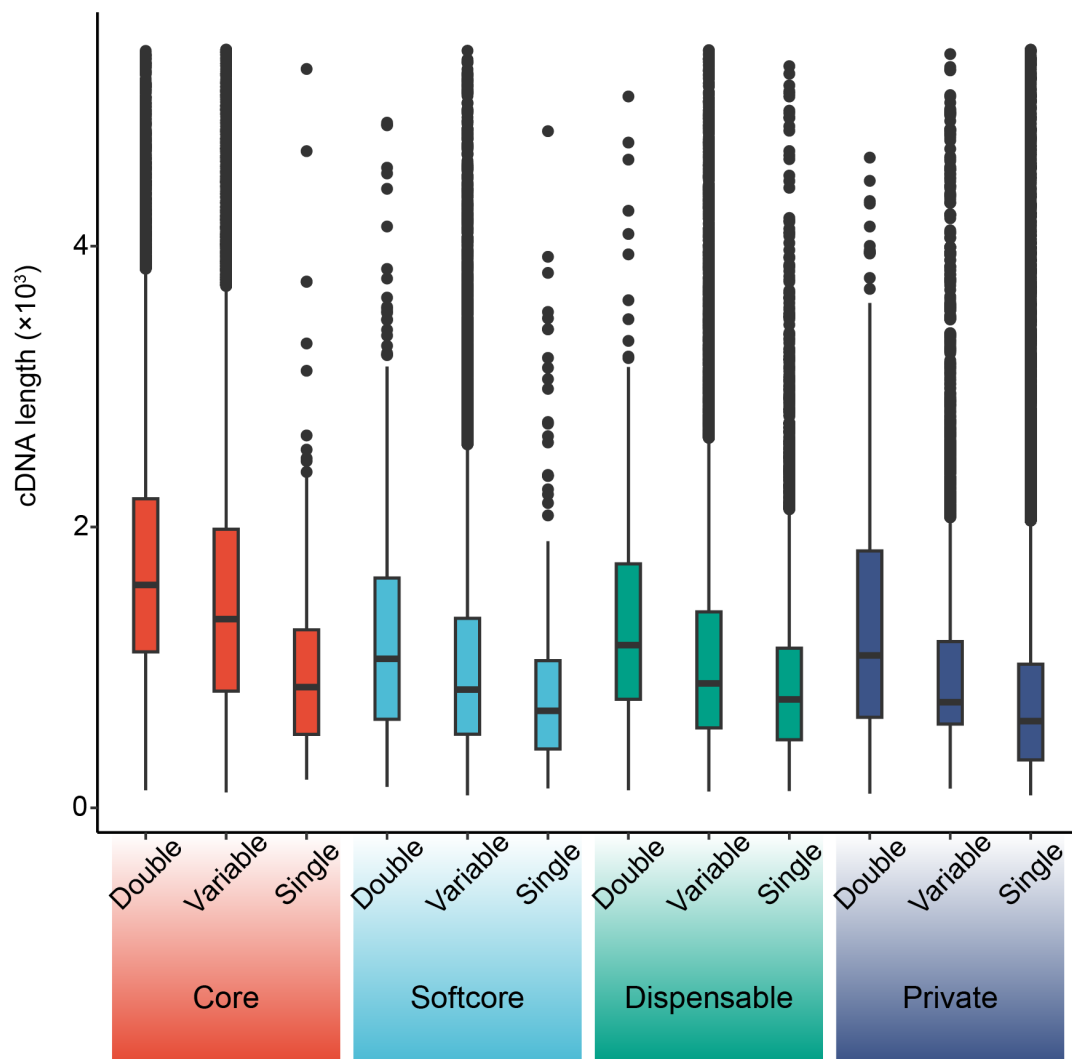

**Supplementary Fig. 12 Box plot of cDNA length in the moso bamboo pangenome.** The y-axis shows the CDS number, and the x-axis represents the gene set type. The box plots show the medians (centerlines), interquartile ranges (boxes), and 1.5 times the interquartile ranges (whiskers).

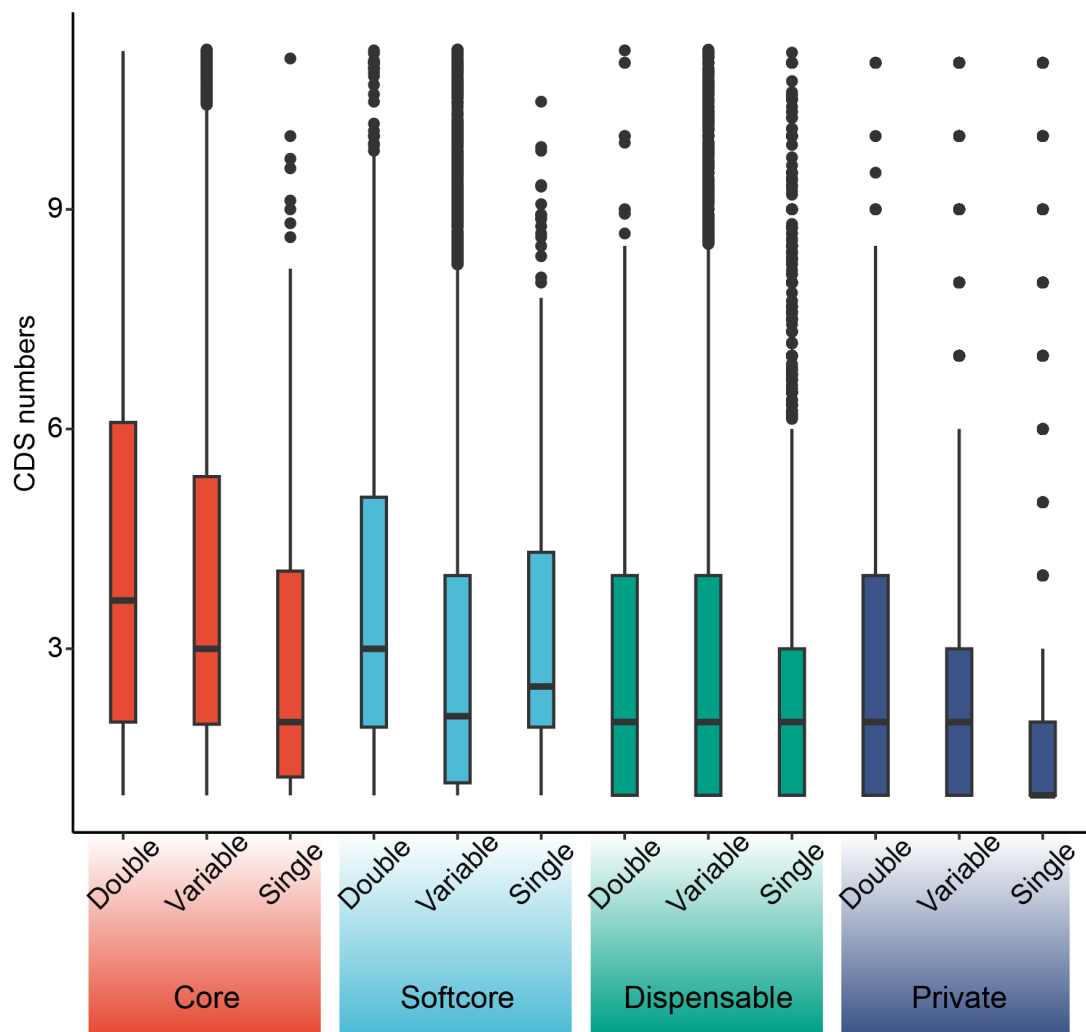

**Supplementary Fig. 13** Box plot of CDS numbers in the moso bamboo pangenome. The y-axis shows the CDS number, and the x-axis represents the gene set type. The box plots show the medians (centerlines), interquartile ranges (boxes), and 1.5 times the interquartile ranges (whiskers).

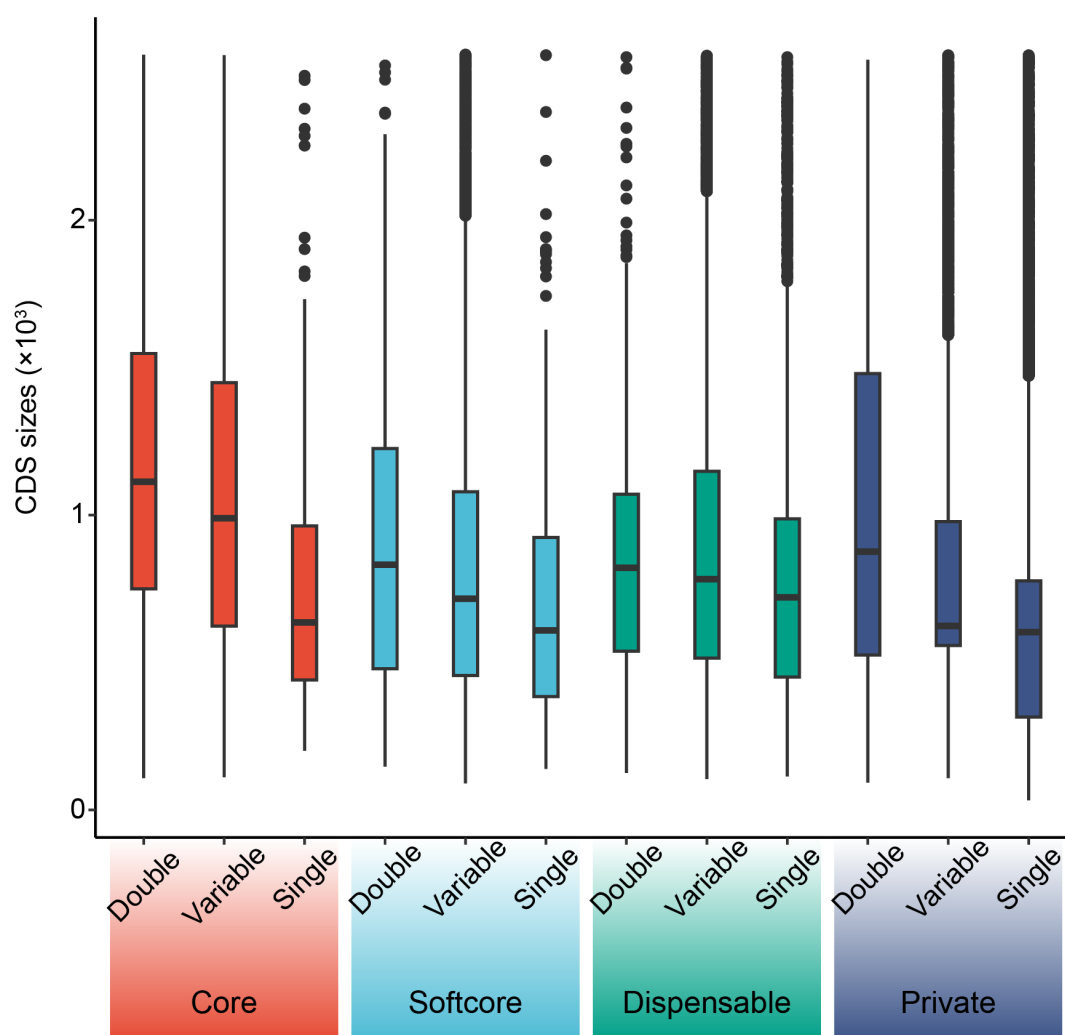

**Supplementary Fig. 14** Box plot of CDS sizes in the moso bamboo pangenome. The y-axis shows CDS sizes, and the x-axis represents the gene set type. The box plots show the medians (centerlines), interquartile ranges (boxes), and 1.5 times the interquartile ranges (whiskers).

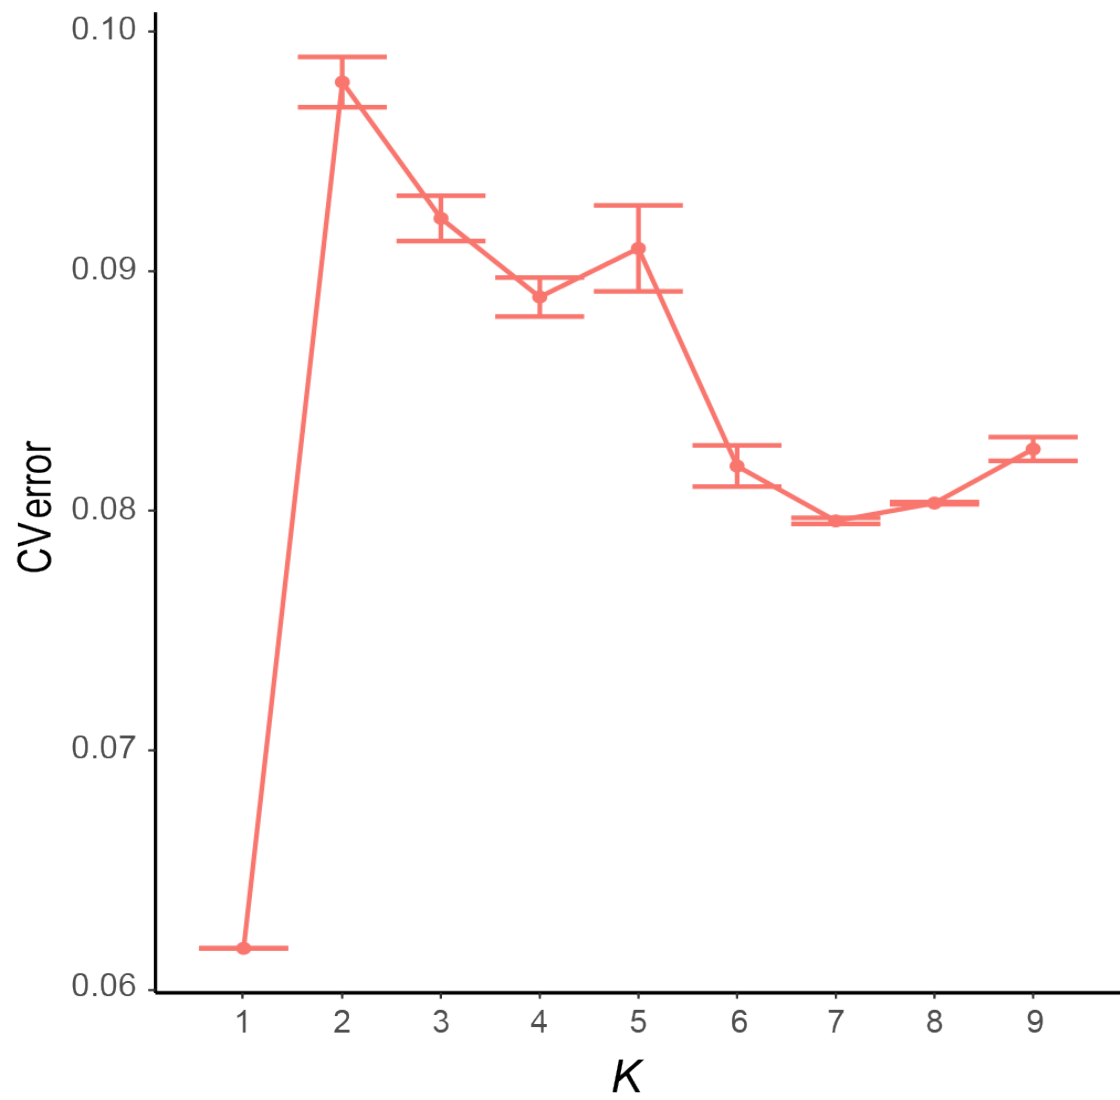

**Supplementary Fig. 15 Cross-validation (CV) error values for different values of  $K$  in an ADMIXTURE analysis.**



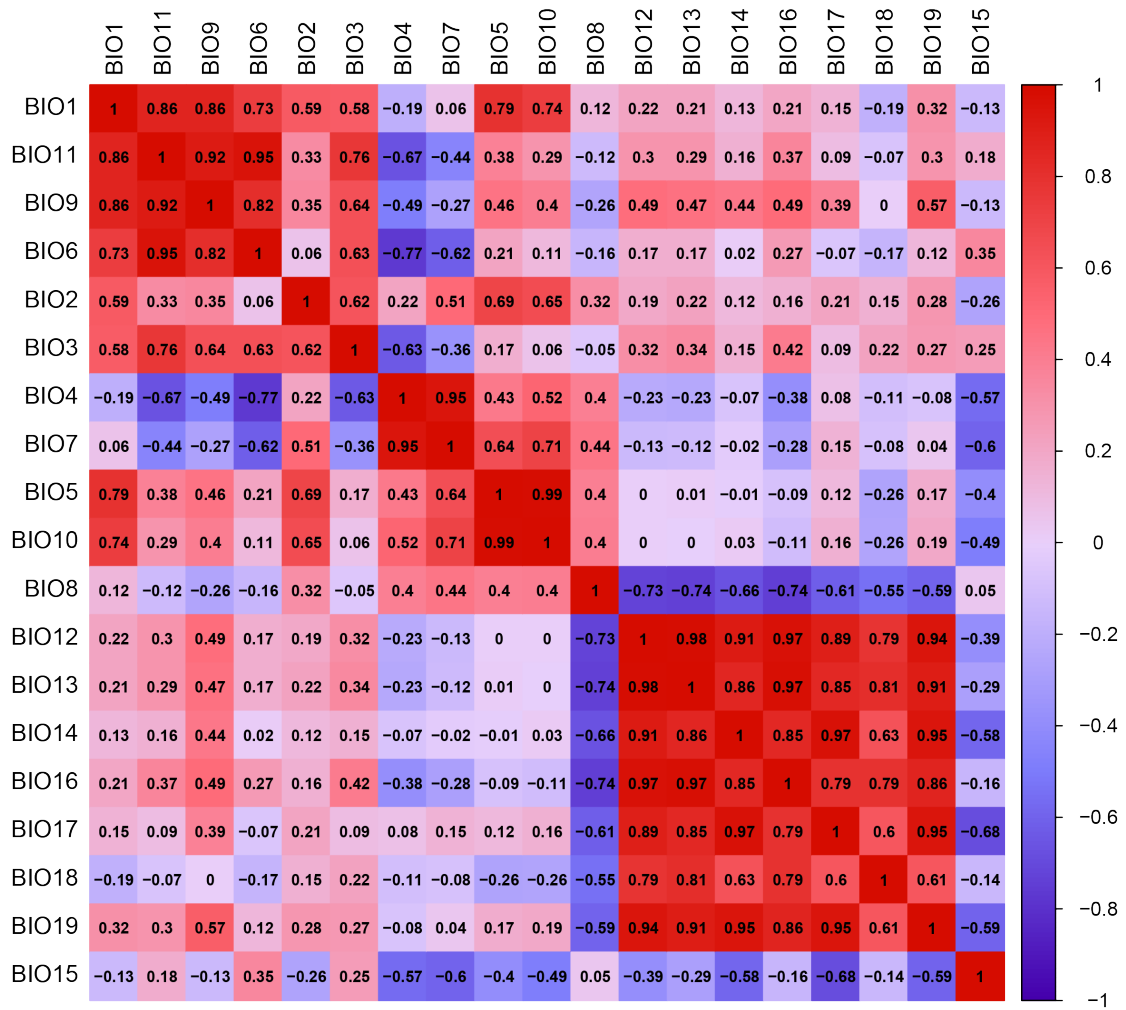

**Supplementary Fig. 16 Correlations of bioclimatic variables.** Red represents a positive correlation, and blue represents a negative correlation.

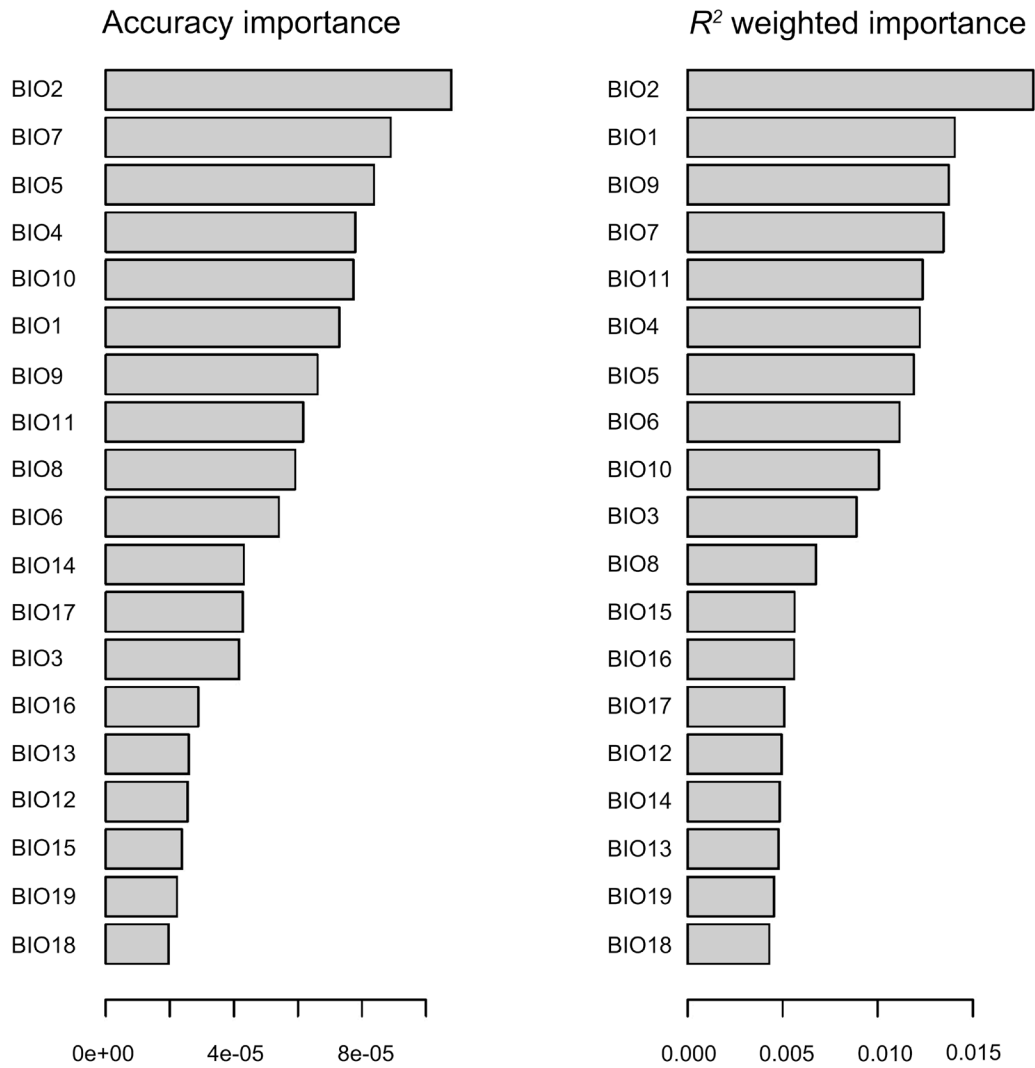

**Supplementary Fig. 17 Gradient forest (GF) ranking of bioclimatic variables.** The left panel shows the accuracy importance, and the right panel shows the  $R^2$  weight importance.

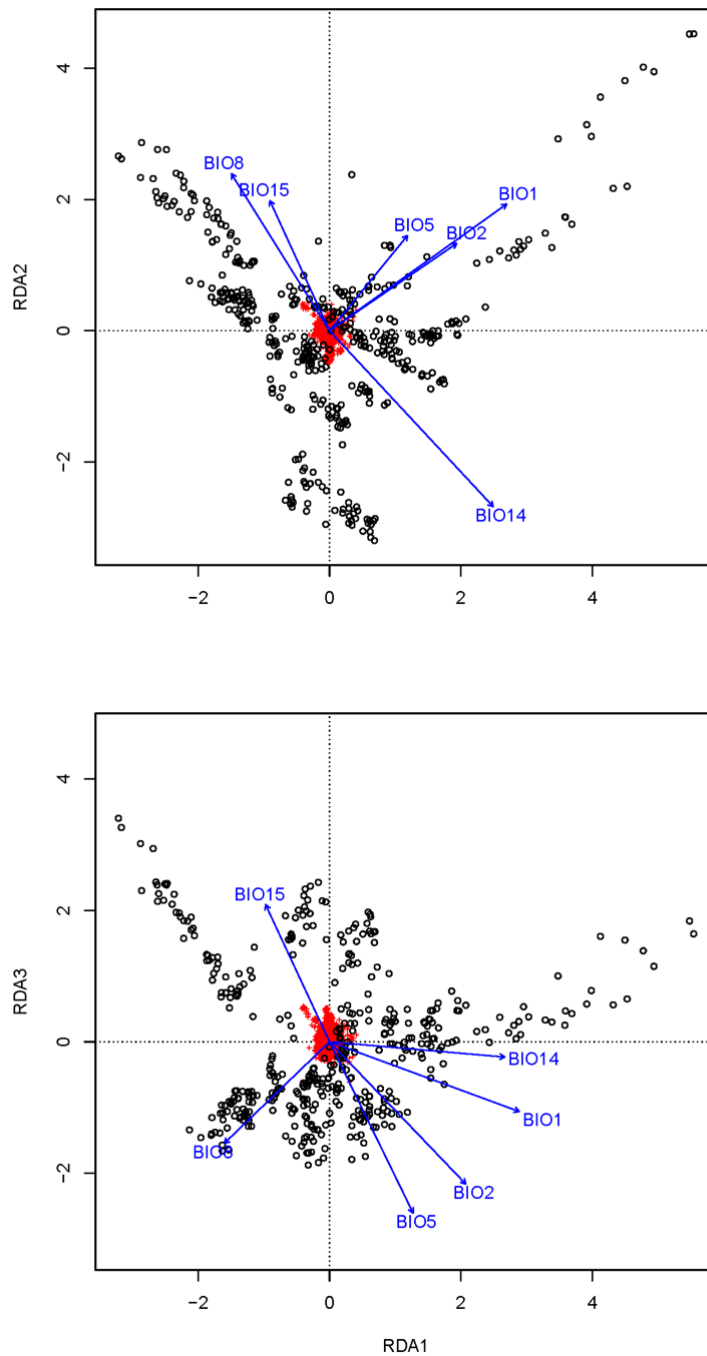

**Supplementary Fig. 18 Redundancy analysis (RDA) plot.** The variations are represented by red dots (in the center of each plot), and each moso bamboo accession is depicted as a black circle. The blue vectors represent the environmental variables. The upper panels represent axes 1 and 2, and the lower panels represent axes 1 and 3.

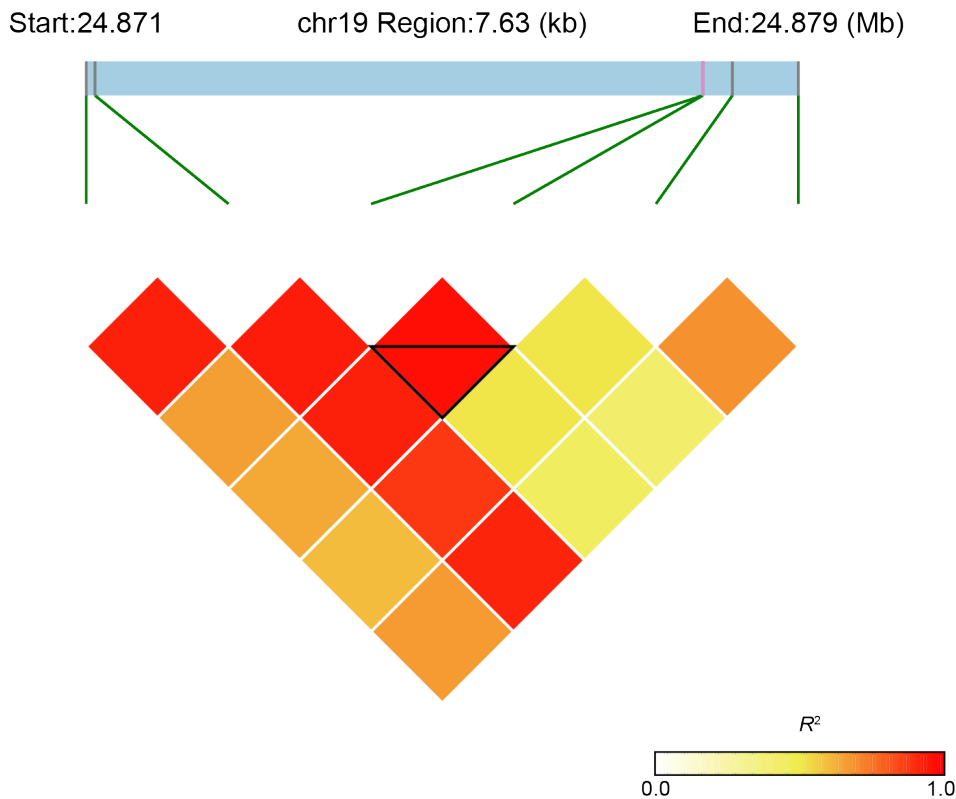

**Supplementary Fig. 19 Linkage disequilibrium (LD) heatmap of the sets of SNPs associated with the maximum temperature of the warmest month (BIO5).** Regional plot of LD on chromosome 19. The main triangle shows LD between variants using the  $R^2$  color scheme, with darker red indicating greater LD (scale 0.0 to 1.0). Each square represents the  $R^2$  value for a pair of variants at particular positions, with darker shading reflecting higher  $R^2$  values. Positional coordinates are depicted along the triangle edges, spanning the depicted region on chromosome 19.

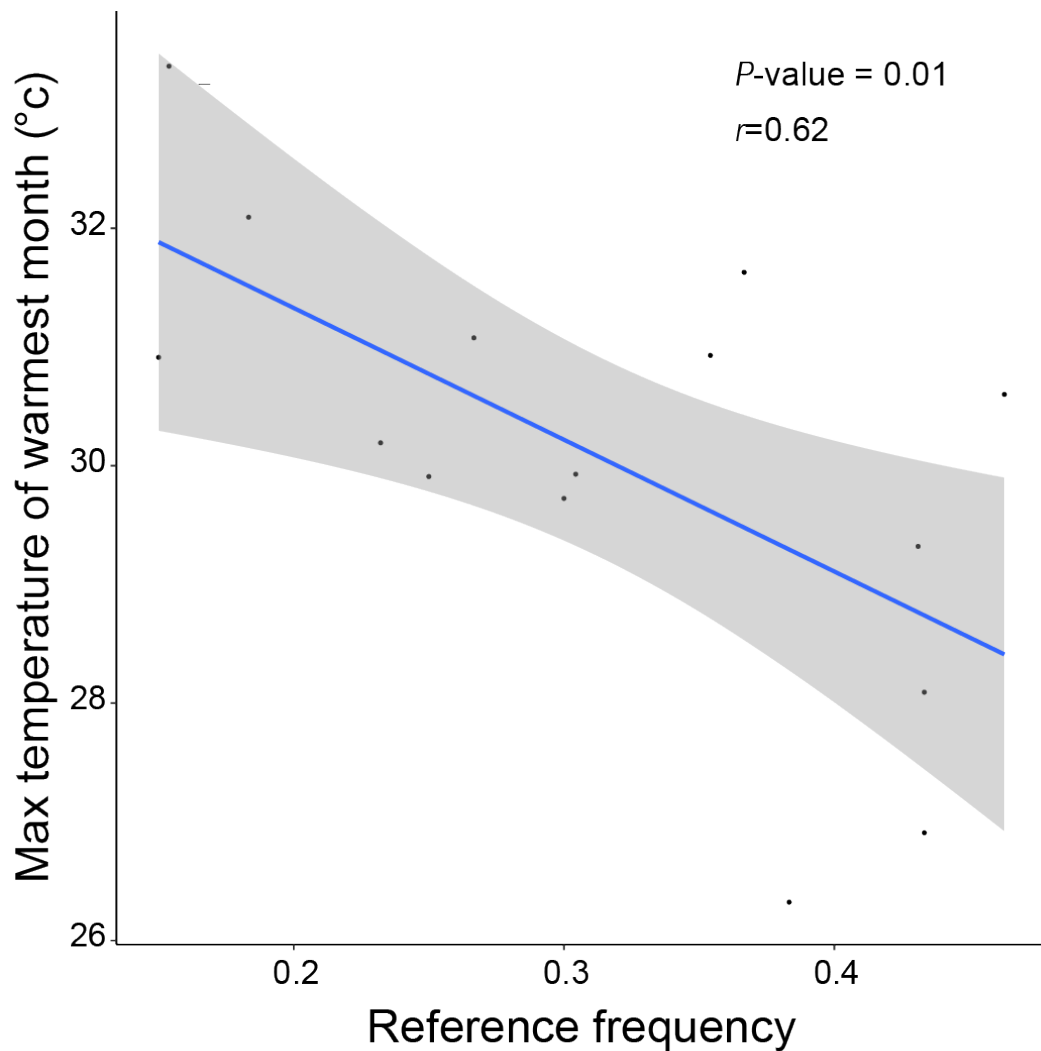

**Supplementary Fig. 20 Correlation between the alternative allele frequency of chr19\_24871064\_SNP and the maximum temperature of the warmest month (BIO5).** Scatter plot showing the relationship between the reference frequency and BIO5. Data points representing individual accessions are depicted as black circles. The blue line indicates the linear regression fit, with the surrounding shaded area representing the 95% confidence interval. A significant positive correlation was observed between ALT frequency and BIO5 ( $r = 0.62$ , two-sided Pearson's correlation test with  $P$ -values =  $0.01 < 0.05$ ).

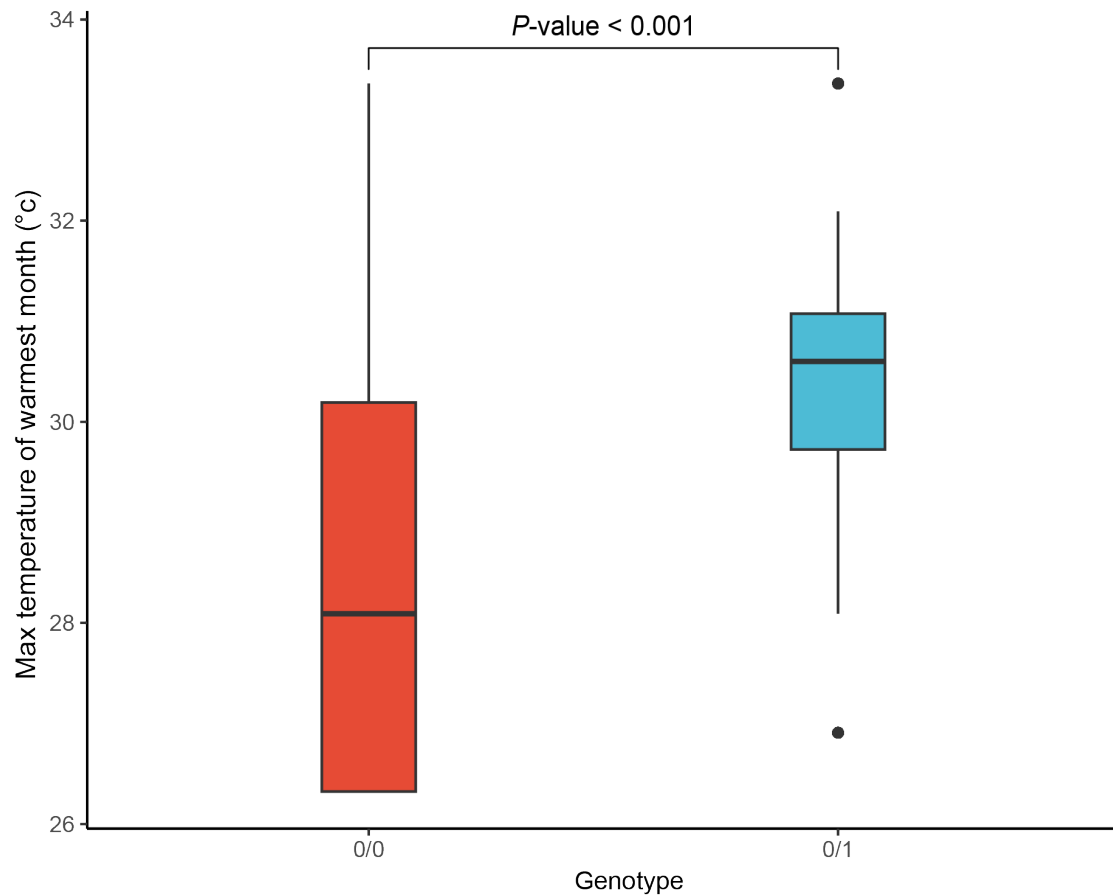

**Supplementary Fig. 21 Comparison of BIO5 across different genotypes of chr18\_28562210\_SV.** Boxplot comparing BIO15 between genotypes 0/0 and 0/1. Boxplots showing the distribution of BIO15 for genotype 0/0 (red,  $n = 82$ ) and genotype 0/1 (blue,  $n = 343$ ). Statistical significance was determined using a two-sided Wilcoxon rank-sum test, with  $P$ -values of  $8.9e-15 < 0.001$ .

Start:64.740 chr13 Region:2.81 (kb) End:64.742 (Mb)

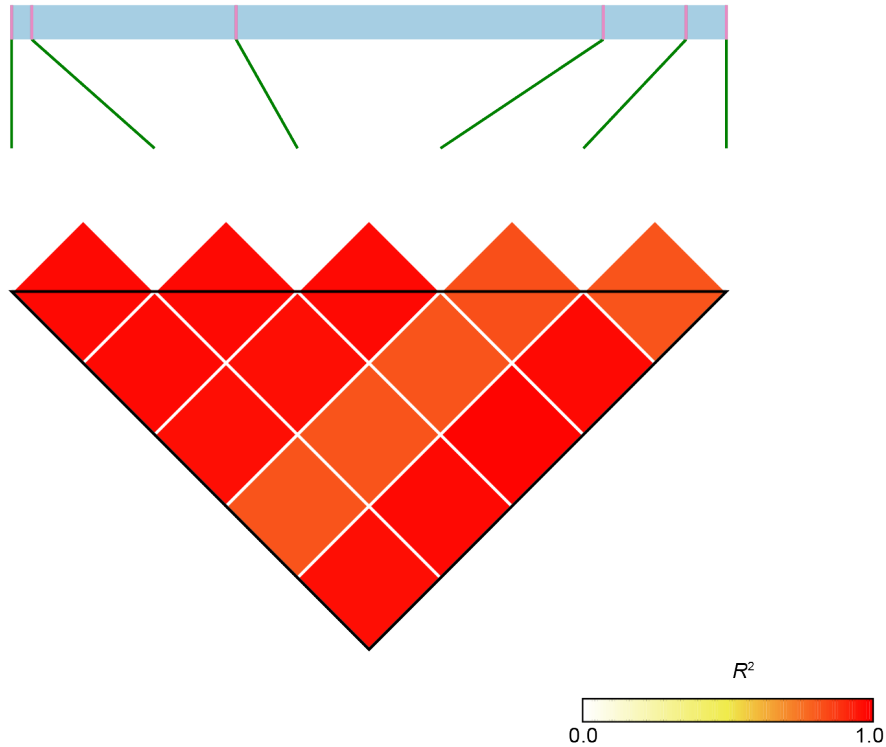

**Supplementary Fig. 22 Linkage disequilibrium (LD) heatmap of the set of SNPs associated with the precipitation of the driest month (BIO14).** Regional plot of LD on chromosome 13. The main triangle shows LD between variants using the  $R^2$  color scheme, with darker red indicating greater LD (scale 0.0 to 1.0). Each square represents the  $R^2$  value for a pair of variants at particular positions, with darker shading reflecting higher  $R^2$  values. Positional coordinates are depicted along the triangle edges, spanning the depicted region on chromosome 13.

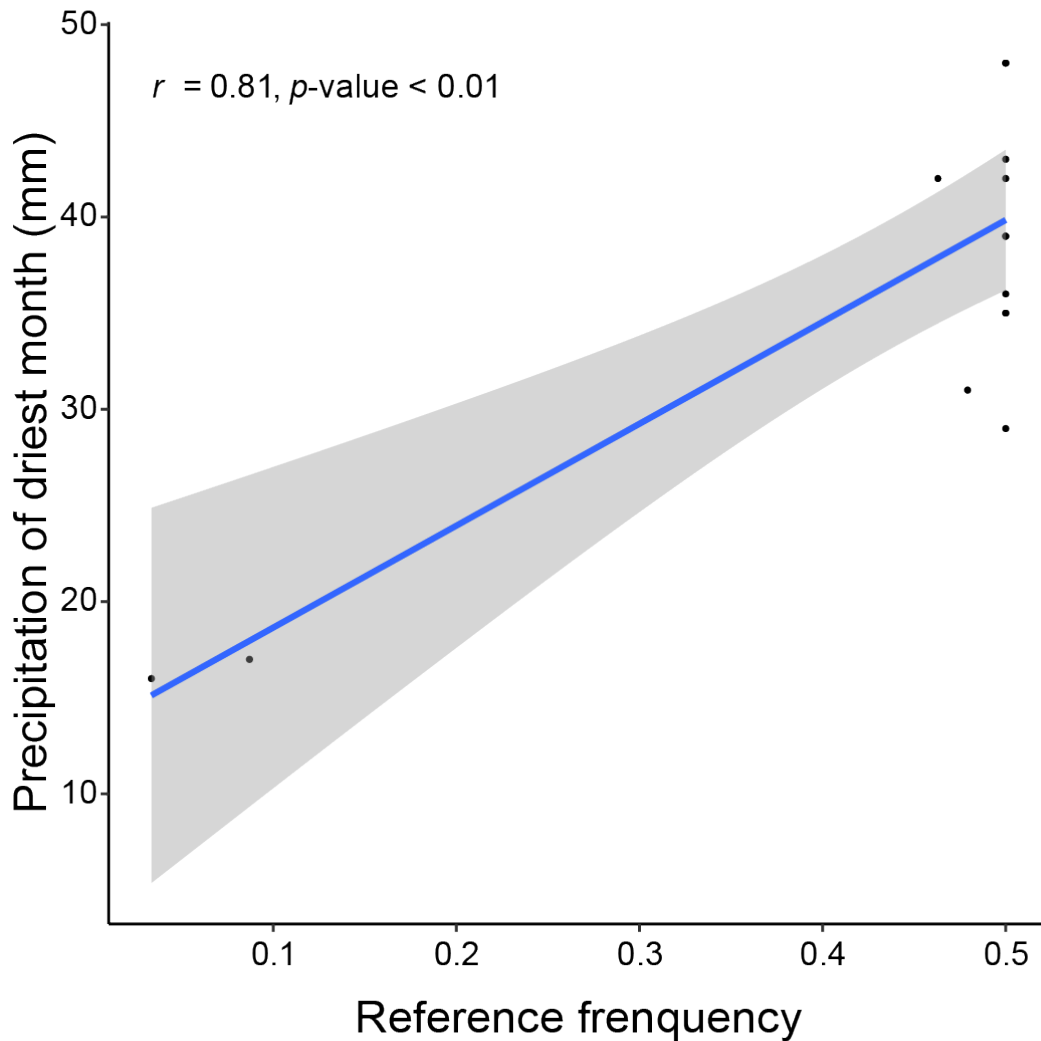

**Supplementary Fig. 23 Correlation between the alternative allele frequency of chr13\_64739621\_SNP and the precipitation of the driest month (BIO14).** Scatter plot examining the relationship between reference frequency and BIO14. Data points representing individual accessions are depicted as black circles. The blue line indicates the linear regression fit, with the surrounding shaded area representing the 95% confidence interval. A significant positive correlation was observed between the reference frequency and BIO14 ( $r = 0.81$ , two-sided Pearson's correlation test with  $P$ -values = 0.00002 < 0.01).



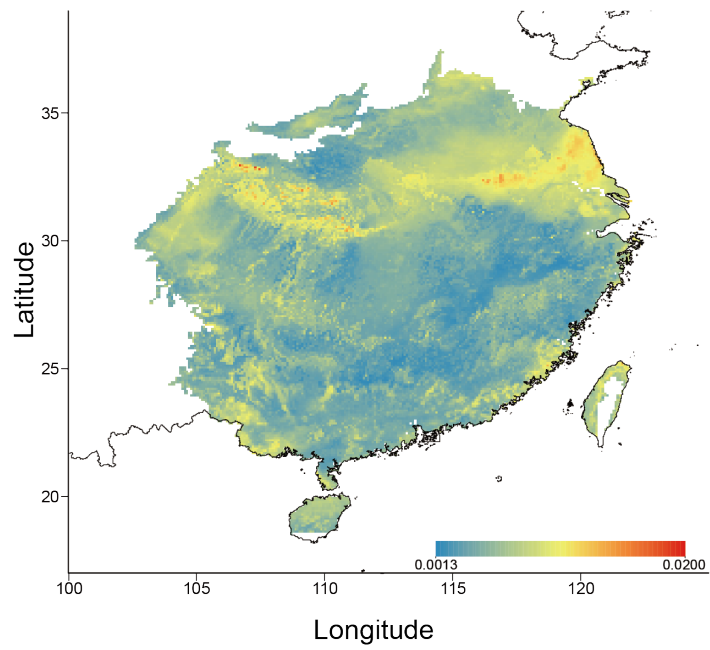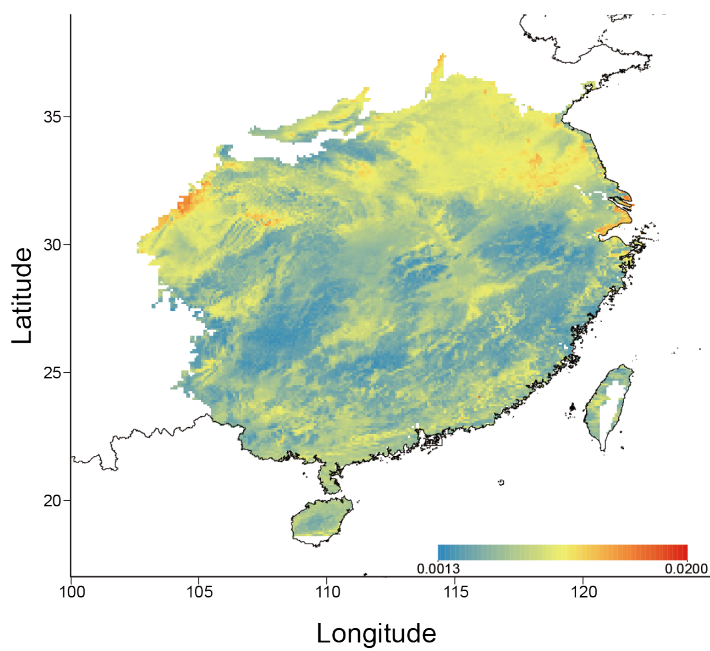

**Supplementary Fig. 24 Map of the predicted forward genomic offset and reverse genomic offset averaged across four climate models across the distribution of moso bamboo under SSP126. The upper panel shows the forward genomic offset, and the lower panel shows the reverse genomic offset.**

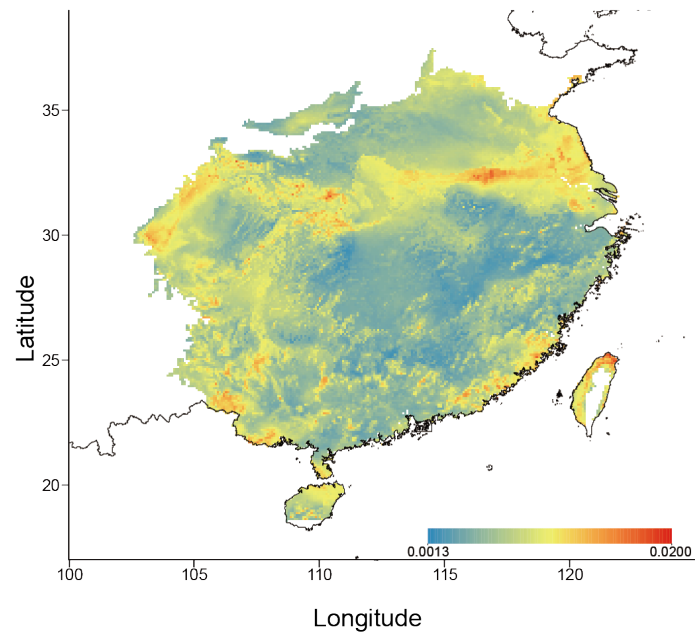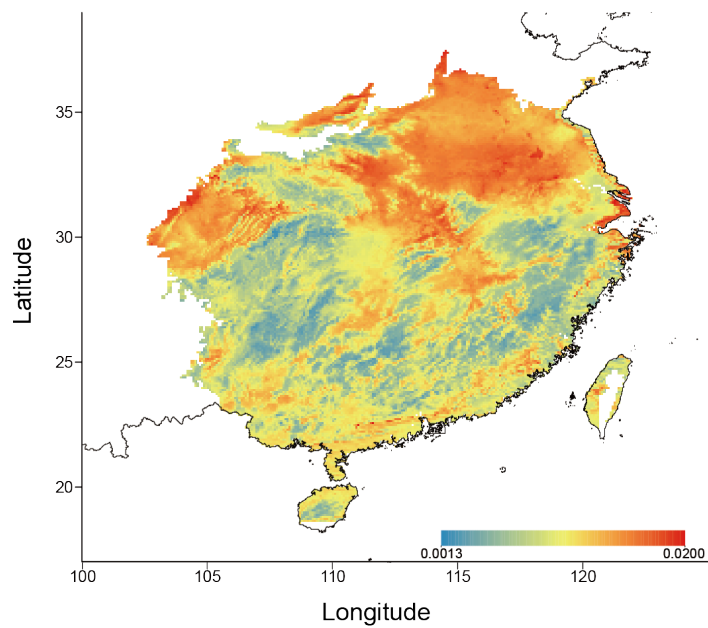

**Supplementary Fig. 25** Map of the predicted forward genomic offset and reverse genomic offset averaged across four climate models across the distribution of moso bamboo under SSP585. The upper panel shows the forward genomic offset, and the lower panel shows the reverse genomic offset.

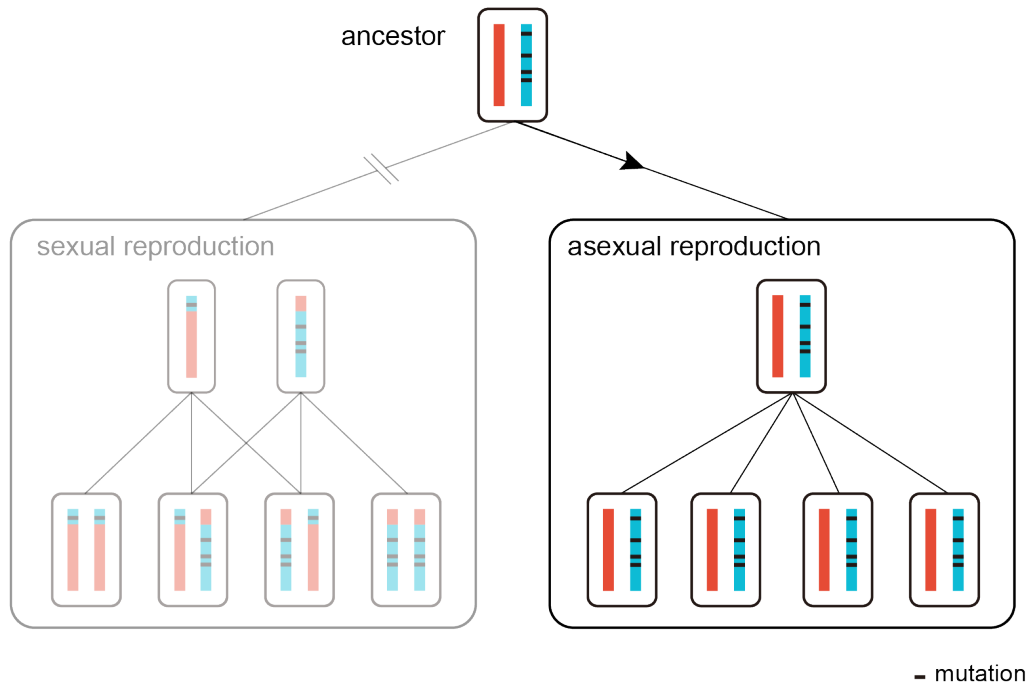

**Supplementary Fig. 26 Schematic diagrams illustrating sexual reproduction and asexual reproduction in moso bamboo.** Color (red and blue) represents two different haplotypes. Although moso bamboo possesses the ability for both sexual (left) and asexual (right) reproduction, it predominantly relies on asexual reproduction through rhizome growth and vegetative propagation. This hypothesis, grounded in the understanding of the reproductive biology of moso bamboo, provides a plausible explanation for the observed pattern of genetic variation. Considering the rarity of somatic mutations, the lack of meiotic recombination due to the predominance of asexual reproduction, and the potential for haplotype divergence in the ancestral population, we provided a schematic diagram for understanding the predominance of inter-haplotype variations in moso bamboo.

**Supplementary Table 1. Summary statistics of PacBio HiFi reads for the 16 representative moso bamboo accessions.**

| Accession                            | HB      | AJ      | RH      | LY      | HZP     | YA      | CS      | YF      | JZ      | XN      | DA      | XA      | YX      | WYS     | CY      | HS      |
|--------------------------------------|---------|---------|---------|---------|---------|---------|---------|---------|---------|---------|---------|---------|---------|---------|---------|---------|
| Polymerase reads                     | 1E+07   | 1E+07   | 1E+07   | 1E+07   | 1E+07   | 1E+07   | 1E+07   | 1E+07   | 1E+07   | 1E+07   | 1E+07   | 1E+07   | 1E+07   | 1E+07   | 1E+07   | 2E+07   |
| Polymerase reads bases (bp)          | 8E+11   | 1E+12   | 1E+12   | 1E+12   | 1E+12   | 9E+11   | 1E+12   | 1E+12   | 1E+12   | 1E+12   | 9E+11   | 9E+11   | 1E+12   | 1E+12   | 1E+12   | 1E+12   |
| Average polymerase reads length (bp) | 76,899  | 94,195  | 99,195  | 222,705 | 89,838  | 96,326  | 222,160 | 220,750 | 90,469  | 88,764  | 87,609  | 86,804  | 215,238 | 217,030 | 97,253  | 77,542  |
| Polymerase reads length N50 (bp)     | 158,935 | 19,3965 | 207,696 | 420,055 | 195,713 | 205,878 | 427,707 | 424,832 | 193,151 | 196,566 | 194,660 | 194,983 | 421,984 | 410,912 | 209,832 | 181,749 |
| Subreads reads                       | 6E+07   | 7E+07   | 6E+07   | 8E+07   | 6E+07   | 6E+07   | 6E+07   | 7E+07   | 7E+07   | 7E+07   | 5E+07   | 6E+07   | 7E+07   | 6E+07   | 7E+07   | 8E+07   |
| Subreads bases (bp)                  | 8E+11   | 1E+12   | 1E+12   | 1E+12   | 1E+12   | 9E+11   | 1E+12   | 1E+12   | 1E+12   | 1E+12   | 9E+11   | 9E+11   | 1E+12   | 1E+12   | 1E+12   | 1E+12   |
| Average subreads length (bp)         | 13,863  | 14,595  | 15,844  | 13,822  | 16,198  | 16,347  | 15,614  | 14,754  | 14,612  | 14,875  | 16,813  | 16,683  | 14,722  | 16,428  | 15,640  | 14,977  |
| Subreads length N50 (bp)             | 15,688  | 16,754  | 17,464  | 14,771  | 18,470  | 18,424  | 17,541  | 15,962  | 15,443  | 16,304  | 18,775  | 19,024  | 16,055  | 17,882  | 17,519  | 16,612  |
| GC mean                              | 0.44    | 0.44    | 0.44    | 0.44    | 0.44    | 0.44    | 0.44    | 0.45    | 0.44    | 0.44    | 0.45    | 0.44    | 0.44    | 0.46    | 0.44    | 0.45    |
| CCS reads                            | 4E+06   | 4E+06   | 4E+06   | 4E+06   | 3E+06   | 4E+06   | 4E+06   | 4E+06   | 4E+06   | 4E+06   | 3E+06   | 3E+06   | 4E+06   | 4E+06   | 4E+06   | 4E+06   |
| CCS bases (bp)                       | 6E+10   | 7E+10   | 7E+10   | 6E+10   | 6E+10   | 6E+10   | 7E+10   | 7E+10   | 6E+10   | 6E+10   | 5E+10   | 6E+10   | 7E+10   | 7E+10   | 7E+10   | 7E+10   |
| Average CCS length (bp)              | 15,850  | 16,239  | 17,657  | 14,766  | 17,977  | 18,345  | 17,401  | 16,059  | 15,096  | 16,157  | 17,855  | 18,609  | 15,977  | 17,318  | 17,494  | 16,904  |
| Max. CCS length (bp)                 | 49,767  | 50,109  | 50,422  | 50,459  | 50,140  | 49,990  | 50,086  | 50,779  | 48,434  | 49,222  | 50,577  | 50,821  | 49,735  | 50,105  | 50,395  | 49,878  |
| CCS length N50 (bp)                  | 16,177  | 17,353  | 18,094  | 14,929  | 18,835  | 19,081  | 18,175  | 16,496  | 15,114  | 16,591  | 18,646  | 19,366  | 16,107  | 17,689  | 18,316  | 16,929  |
| Depth (X) based on 1.91 Gb           | 32.433  | 34.216  | 37.768  | 32.973  | 32.418  | 33.694  | 34.067  | 34.265  | 32.613  | 31.5    | 27.992  | 31.848  | 35.003  | 33.976  | 36.265  | 36.747  |

**Supplementary Table 2. Estimated switch errors for phased genomes of the 16 representative moso bamboo accessions.**

| <b>Accession</b> | <b>Switch error (%)</b> |
|------------------|-------------------------|
| AJ               | 6.43                    |
| CS               | 6.89                    |
| CY               | 2.36                    |
| DA               | 9.06                    |
| HB               | 3.58                    |
| HS               | 3.39                    |
| HZP              | 3.56                    |
| JZ               | 4.52                    |
| LY               | 4.40                    |
| RH               | 4.78                    |
| WYS              | 6.12                    |
| XA               | 5.73                    |
| XN               | 5.54                    |
| YA               | 6.49                    |
| YF               | 8.40                    |
| YX               | 5.82                    |

**Supplementary Table 3. Summary statistics of Hi-C data for accessions CY, HB, and HZP.**

| <b>Accession</b> | <b>Raw Reads<br/>Number</b> | <b>Raw Bases<br/>Number</b> | <b>Clean Reads<br/>Number</b> | <b>Clean Bases<br/>Number</b> | <b>Q30<br/>(%)</b> | <b>Depth (X)<br/>based on<br/>1.91 Gb</b> |
|------------------|-----------------------------|-----------------------------|-------------------------------|-------------------------------|--------------------|-------------------------------------------|
| CY               | 1,755,395,808               | 263,309,371,200             | 1,719,807,574                 | 257,971,136,100               | 91.11              | 135.06                                    |
| HZP              | 1,816,619,620               | 272,492,943,000             | 1,734,429,002                 | 260,164,350,300               | 89.25              | 136.21                                    |
| HB               | 1,747,116,446               | 262,067,466,900             | 1,626,471,218                 | 243,970,682,700               | 89.08              | 127.73                                    |
| Average          | 1,773,043,958               | 265,956,593,700             | 1,693,569,265                 | 254,035,389,700               | 89.81              | 139.24                                    |
| Total            | 5,319,131,874               | 797,869,781,100             | 5,080,707,794                 | 762,106,169,100               | -                  | 417.73                                    |

**Supplementary Table 4. Summary statistics of allele pairs.**

| <b>Accession</b> | <b>Haplotype 1</b> | <b>Haplotype 2</b> | <b>Gene<br/>with two<br/>alleles</b> | <b>Allele<br/>pairs</b> | <b>Single alleles in<br/>Haplotype 1</b> | <b>Single alleles in<br/>Haplotype 2</b> |
|------------------|--------------------|--------------------|--------------------------------------|-------------------------|------------------------------------------|------------------------------------------|
| AJ               | 55,190             | 52,271             | 90,490                               | 45,245                  | 9,945                                    | 7,026                                    |
| CS               | 53,812             | 51,062             | 83,194                               | 41,597                  | 12,215                                   | 9,465                                    |
| CY               | 55,903             | 55,465             | 98,128                               | 49,064                  | 6,839                                    | 6,401                                    |
| DA               | 54,118             | 52,947             | 91,294                               | 45,647                  | 8,471                                    | 7,300                                    |
| HB               | 54,656             | 55,112             | 96,322                               | 48,161                  | 6,495                                    | 6,951                                    |
| HS               | 58,130             | 56,413             | 99,660                               | 49,830                  | 8,300                                    | 6,583                                    |
| HZP              | 55,781             | 56,456             | 97,722                               | 48,861                  | 6,920                                    | 7,595                                    |
| JZ               | 53,426             | 54,871             | 92,648                               | 46,324                  | 7,102                                    | 8,547                                    |
| LY               | 53,416             | 51,582             | 90,444                               | 45,222                  | 8,194                                    | 6,360                                    |
| RH               | 54,220             | 52,994             | 92,362                               | 46,181                  | 8,039                                    | 6,813                                    |
| WYS              | 55,658             | 54,087             | 93,674                               | 46,837                  | 8,821                                    | 7,250                                    |
| XA               | 55,207             | 52,029             | 86,020                               | 43,010                  | 12,197                                   | 9,019                                    |
| XN               | 53,867             | 53,984             | 91,764                               | 45,882                  | 7,985                                    | 8,102                                    |
| YA               | 55,876             | 54,896             | 97,164                               | 48,582                  | 7,294                                    | 6,314                                    |
| YF               | 53,988             | 52,498             | 83,760                               | 41,880                  | 12,108                                   | 10,618                                   |
| YX               | 55,533             | 53,514             | 95,444                               | 47,722                  | 7,811                                    | 5,792                                    |

**Supplementary Table 5. Comparison of variations between each accession and the reference genome haplotypes.**

| Accession | Short variation                     |                                 |                                     | SV                                  |                                 |                                     |
|-----------|-------------------------------------|---------------------------------|-------------------------------------|-------------------------------------|---------------------------------|-------------------------------------|
|           | Same as reference (inter-haplotype) | Only in query (inter-accession) | Only in reference (inter-accession) | Same as reference (inter-haplotype) | Only in query (inter-accession) | Only in reference (inter-accession) |
| AJ        | 2,027,150                           | 83,147                          | 106,297                             | 17,509                              | 1,656                           | 1,528                               |
| CS        | 2,021,790                           | 78,516                          | 113,659                             | 17,486                              | 1,634                           | 1,551                               |
| DA        | 2,048,481                           | 86,352                          | 82,940                              | 17,147                              | 1,505                           | 1,890                               |
| HB        | 2,028,758                           | 83,939                          | 105,328                             | 17,071                              | 1,576                           | 1,966                               |
| HS        | 2,065,266                           | 108,353                         | 62,670                              | 17,383                              | 2,183                           | 1,654                               |
| HZP       | 2,072,642                           | 82,486                          | 61,725                              | 17,431                              | 1,626                           | 1,606                               |
| JZ        | 2,062,377                           | 83,934                          | 71,672                              | 17,385                              | 1,605                           | 1,652                               |
| LY        | 2,060,083                           | 85,260                          | 73,755                              | 17,282                              | 1,609                           | 1,755                               |
| RH        | 2,026,487                           | 76,197                          | 107,457                             | 17,319                              | 1,700                           | 1,718                               |
| WYS       | 2,032,146                           | 76,796                          | 101,897                             | 17,442                              | 1,589                           | 1,595                               |
| XA        | 2,039,072                           | 83,367                          | 94,910                              | 17,337                              | 1,722                           | 1,700                               |
| XN        | 2,021,787                           | 85,512                          | 109,003                             | 17,273                              | 1,600                           | 1,764                               |
| YA        | 2,050,853                           | 83,801                          | 83,331                              | 17,402                              | 1,683                           | 1,635                               |
| YF        | 2,004,919                           | 106,908                         | 120,330                             | 17,223                              | 2,110                           | 1,814                               |
| YX        | 2,022,490                           | 81,956                          | 112,175                             | 17,386                              | 1,622                           | 1,651                               |



**Supplementary Table 6. Estimated frequency of short variations.**

| <b>Accession</b> | <b>All short variants number</b> | <b>Reference size (bp)</b> | <b>Number of all short variants per bp</b> | <b>Inter-accession number</b> | <b>Number of inter-accession short variants per bp</b> |
|------------------|----------------------------------|----------------------------|--------------------------------------------|-------------------------------|--------------------------------------------------------|
| AJ               | 2,110,297                        | 1,962,743,480              | 930.08                                     | 83,147                        | 23,605.70                                              |
| CS               | 2,100,306                        | 1,962,743,480              | 934.50                                     | 78,516                        | 24,998.01                                              |
| DA               | 2,134,833                        | 1,962,743,480              | 919.39                                     | 86,352                        | 22,729.57                                              |
| HB               | 2,112,697                        | 1,962,743,480              | 929.02                                     | 83,939                        | 23,382.97                                              |
| HS               | 2,173,619                        | 1,962,743,480              | 902.98                                     | 108,353                       | 18,114.34                                              |
| HZP              | 2,155,128                        | 1,962,743,480              | 910.73                                     | 82,486                        | 23,794.87                                              |
| JZ               | 2,146,311                        | 1,962,743,480              | 914.47                                     | 83,934                        | 23,384.37                                              |
| LY               | 2,145,343                        | 1,962,743,480              | 914.89                                     | 85,260                        | 23,020.68                                              |
| RH               | 2,102,684                        | 1,962,743,480              | 933.45                                     | 76,197                        | 25,758.80                                              |
| WYS              | 2,108,942                        | 1,962,743,480              | 930.68                                     | 76,796                        | 25,557.89                                              |
| XA               | 2,122,439                        | 1,962,743,480              | 924.76                                     | 83,367                        | 23,543.41                                              |
| XN               | 2,107,299                        | 1,962,743,480              | 931.40                                     | 85,512                        | 22,952.84                                              |
| YA               | 2,134,654                        | 1,962,743,480              | 919.47                                     | 83,801                        | 23,421.48                                              |
| YF               | 2,111,827                        | 1,962,743,480              | 929.41                                     | 106,908                       | 18,359.18                                              |
| YX               | 2,104,446                        | 1,962,743,480              | 932.67                                     | 81,956                        | 23,948.75                                              |
| Total            | 31,870,825                       | 1,962,743,480              | 923.86                                     | 975,223                       | 23,104.86                                              |

**Supplementary Table 7. Number of SNPs between three haplotype-resolved accessions.**

| <b>Assembly 1</b> | <b>Assembly 2</b> | <b>SNP number</b> |
|-------------------|-------------------|-------------------|
| CY hap1           | HZP hap1          | 785,577           |
| CY hap1           | HZP hap2          | 2,792,068         |
| CY hap2           | HZP hap2          | 787,969           |
| CY hap2           | HZP hap1          | 2,794,863         |
| CY hap1           | HB hap1           | 433,970           |
| CY hap1           | HB hap2           | 3,085,151         |
| CY hap2           | HB hap2           | 468,651           |
| CY hap2           | HB hap1           | 3,137,431         |
| HZP hap1          | HB hap1           | 683,455           |
| HZP hap1          | HB hap2           | 2,907,917         |
| HZP hap2          | HB hap2           | 667,226           |
| HZP hap2          | HB hap1           | 2,883,394         |

\* The number of SNPs was obtained directly from the genome alignment.

**Supplementary Table 8. Standard deviation of genome-wide distribution patterns for inter-haplotype and inter-accession variations.**

| <b>Variations type</b> | <b>Inter-haplotype variation</b> | <b>Inter-accession variation</b> | <b>Inter-haplotype SV</b> | <b>Inter-accession SV</b> |
|------------------------|----------------------------------|----------------------------------|---------------------------|---------------------------|
| Standard Deviation     | 236.7887292                      | 24.15605428                      | 2.07802511                | 1.09571224                |

**Supplementary Table 9. Statistical significance of differences in gene length between moso bamboo pangenome groups.**

| <b>Group 1</b>     | <b>Group 2</b>       | <b><i>P</i>-values</b> |
|--------------------|----------------------|------------------------|
| core-double        | core-single          | 4.15e-24               |
| softcore-double    | softcore-single      | 9.98e-07               |
| dispensable-double | dispensable-single   | 4.25e-09               |
| private-double     | private-single       | 7.00e-69               |
| core-double        | dispensable-double   | 3.19e-14               |
| core-variable      | dispensable-variable | 7.73e-248              |
| core-single        | dispensable-single   | 0.58                   |
| core-double        | private-double       | 5.30e-84               |

\**P*-values were calculated using a two-sided Wilcoxon rank-sum test.

**Supplementary Table 10. Statistical significance of differences in expression level (TPM) between moso bamboo pangenome groups.**

| <b>Group 1</b>     | <b>Group 2</b>       | <b><i>P</i>-values</b> |
|--------------------|----------------------|------------------------|
| core-double        | core-single          | 2.00e-16               |
| softcore-double    | softcore-single      | 3.47e-14               |
| dispensable-double | dispensable-single   | 1.32e-23               |
| private-double     | private-single       | 0.033                  |
| core-double        | dispensable-double   | 3.12e-25               |
| core-variable      | dispensable-variable | 0                      |
| core-single        | dispensable-single   | 1.03e-08               |
| core-double        | private-double       | 3.99e-77               |

\**P*-values were calculated using a two-sided Wilcoxon rank-sum test.

**Supplementary Table 11. Statistical significance of differences in the tissue specificity index (Tau) between moso bamboo pangenome groups.**

| <b>Group 1</b>     | <b>Group 2</b>       | <b><i>P</i>-value</b> |
|--------------------|----------------------|-----------------------|
| core-double        | core-single          | 1.52e-05              |
| softcore-double    | softcore-single      | 0.003                 |
| dispensable-double | dispensable-single   | 0.06                  |
| private-double     | private-single       | 0.46                  |
| core-double        | dispensable-double   | 7.19e-16              |
| core-variable      | dispensable-variable | 4.21e-204             |
| core-single        | dispensable-single   | 0.002                 |
| core-double        | private-double       | 3.74e-30              |

\**P*-values were calculated using a two-sided Wilcoxon rank-sum test.

**Supplementary Table 12. RDA models of inertia proportions of variations.**

| <b>RDA models</b> | <b>Candidate Inertia</b> | <b>Proportion of candidate variations</b> | <b>Total Inertia</b> | <b>Proportion of total variations</b> |
|-------------------|--------------------------|-------------------------------------------|----------------------|---------------------------------------|
| F~geno            | 136.71                   | 0.13                                      | 13,110               | 0.00494                               |
| F~env             | 372.34                   | 0.35                                      | 38,090               | 0.01435                               |
| F~ geno env       | 52.78                    | 0.05                                      | 12,410               | 0.004676                              |
| F~ env geno       | 288.42                   | 0.27                                      | 37,390               | 0.01409                               |
| F~env+geno        | 425.13                   | 0.40                                      | 50,500               | 0.019                                 |
| Total inertia     | 1050.00                  | 1.00                                      | 2,654,000            | 1                                     |

**Supplementary Table 13. Software packages, versions, and parameters used in this study.**

| Software                          | Version      | Parameters                                                                                                        | Function                   |
|-----------------------------------|--------------|-------------------------------------------------------------------------------------------------------------------|----------------------------|
| <b>Genome assembly</b>            |              |                                                                                                                   |                            |
| CCS algorithm                     | v6.2.0       | default parameters                                                                                                | Generate CCS reads         |
| Hifiasm                           | v0.16.1-r375 | default parameters                                                                                                | Genome assembling          |
| BUSCO                             | v5.4.3       | -m genome                                                                                                         | Genome evaluation          |
| LTR_retriever                     | v2.9.0       | default parameters                                                                                                | LTR prediction             |
| Meryl                             | v1.41        | k = 20                                                                                                            | Generate Meryl databases   |
| Mercury                           | v1.3         | default parameters                                                                                                | Genome evaluation          |
| <b>Genome annotation</b>          |              |                                                                                                                   |                            |
| RepeatModeler                     | v2.0.3       | -LTRStruct                                                                                                        | de novo repeat library     |
| RepeatMasker                      | v4.1.2-p1    | default parameters                                                                                                | de novo repeat library     |
| GeneWise                          | v2.4.1       | -max_gene_length 23707 -<br>segmentSize 1000000 -<br>overlapSize 100000 -<br>coverage_ratio 0.4 -evaluate<br>1e-9 | Gene prediction            |
| Trimmomatic                       | v0.38        | default parameters                                                                                                | RNA-seq quality control    |
| HISAT2                            | v2.1.0       | -min-intronlen 20 -max-<br>intronlen 20000 -dta -<br>score-min L,0.0,-0.4                                         | Mapping to genome          |
| AUGUSTUS                          | v3.4.0       | default parameters                                                                                                | ab initio prediction       |
| BUSCO                             | v5.4.3       | default parameters                                                                                                | Annotation evaluation      |
| DIAMOND                           |              | --sensitive --max-target-<br>seqs 200 --evaluate 1e-5                                                             | Mapping to database        |
| <b>Switch errors calculation</b>  |              |                                                                                                                   |                            |
| pbbmm2                            | v1.5.0       | --preset HIFI --sort                                                                                              | Mapping to genome          |
| DeepVariant                       | v1.4.0       | --model_type PACBIO                                                                                               | Variation detection        |
| Whatshap                          | v1.1         | --ignore-read-groups                                                                                              | SNP phasing                |
| nucmer                            | v4.0.0rc1    | -mum -l 1000 -c 200 -g<br>200                                                                                     | Genome alignment           |
| show-snps                         | v4.0.0rc1    | default parameters                                                                                                | SNP calling                |
| Bwa mem                           | v0.7.17      | default parameters                                                                                                | Mapping to genome          |
| DeepVariant                       | v1.4.0       | -SP5M                                                                                                             | Variation detection (Hi-C) |
| <b>Allele identification</b>      |              |                                                                                                                   |                            |
| BLASTP                            | v2.9.0+      | -evaluate 1e-10                                                                                                   | Protein alignment          |
| Minimap2                          | v2.24-r1122  | -ax asm5                                                                                                          | Genome alignment           |
| <b>Allele-specific expression</b> |              |                                                                                                                   |                            |
| HISAT2                            | v2.1.0       | -k 1                                                                                                              | Mapping to genome          |



|                                                         |             |                                                                                                                                                          |                                  |
|---------------------------------------------------------|-------------|----------------------------------------------------------------------------------------------------------------------------------------------------------|----------------------------------|
| StringTie                                               | v1.3.5      | default parameters                                                                                                                                       | TPM calculation                  |
| DESeq2                                                  | v1.34.0     | default parameters                                                                                                                                       | Differential expression analysis |
| <b>SNP and InDel identification</b>                     |             |                                                                                                                                                          |                                  |
| nucmer                                                  | v4.0.0rc1   | --mum -l 100 -c 200 -g 200                                                                                                                               | Genome alignment                 |
| show-snps                                               | v4.0.0rc1   | -Clr                                                                                                                                                     | SNP calling                      |
| svim-asm                                                | v1.0.2      | --min_sv_size 1 --<br>min_sv_size 50                                                                                                                     | InDel calling                    |
| pbbmm2                                                  | v1.5.0      | --preset HIFI --sort                                                                                                                                     | Mapping to genome                |
| DeepVariant                                             | v1.4.063    | --model_type PACBIO                                                                                                                                      | Variation calling                |
| <b>Structural variation identification</b>              |             |                                                                                                                                                          |                                  |
| Minimap2                                                | v2.24-r1122 | --paf-no-hit -ax map-hifi                                                                                                                                | Mapping to genome                |
| cuteSV                                                  | v1.0.13     | -l 50 -s 5 --<br>max_cluster_bias_INS<br>1000 --<br>diff_ratio_merging_INS<br>0.9 --<br>max_cluster_bias_DEL<br>1000 --<br>diff_ratio_merging_DEL<br>0.5 | SV calling                       |
| Ngmlr                                                   | v0.2.7      | default parameters                                                                                                                                       | Mapping to genome                |
| sniffles                                                | v1.0.12     | -s 5 -l 50                                                                                                                                               | SV calling                       |
| pbbmm2                                                  | v1.5.0      | --preset HIFI                                                                                                                                            | Mapping to genome                |
| pbsv                                                    | v2.8.0      | default parameters                                                                                                                                       | SV calling                       |
| Minimap2                                                | v2.24-r1122 | --paf-no-hit -a -x asm5 --cs                                                                                                                             | Mapping to genome                |
| svim-asm                                                | v1.0.2      | --min_sv_size 50                                                                                                                                         | SV calling                       |
| Nucmer                                                  | v4.0.0rc1   | --maxmatch -l 100 -c 500                                                                                                                                 | Mapping to genome                |
| Assemblytics                                            | v1.2.1      | default parameters                                                                                                                                       | SV calling                       |
| <b>Graph-based pangenome construction</b>               |             |                                                                                                                                                          |                                  |
| vg construct                                            | v1.38       | -a -S                                                                                                                                                    | Construct vg from a reference    |
| vg gbwt                                                 | v1.38       | -P                                                                                                                                                       | Manipulate GBWTs                 |
| vg snarls                                               | v1.38       | default parameters                                                                                                                                       | Generate snarls from graph       |
| vg index                                                | v1.38       | default parameters                                                                                                                                       | Generate vg index                |
| vg giraffe                                              | v1.38       | default parameters                                                                                                                                       | Short read mapping to vg         |
| <b>SNP and InDel calling based on resequenced reads</b> |             |                                                                                                                                                          |                                  |
| BWA                                                     | v0.7.17     | -M                                                                                                                                                       | Mapping to genome                |
| GATK GVCF                                               | v4.2.0      | -ERC GVCF --native-pair-<br>hmm-threads 100                                                                                                              | SNP calling                      |
| PLINK                                                   | v1.9        | -indep-pairphase 100 10<br>0.2                                                                                                                           | LD pruning                       |
| ADMIXTURE                                               | v1.3.0      | -cv -j4                                                                                                                                                  | Assess population structure      |

| <b>Identification of climate-associated variations</b> |         |                                           |                |
|--------------------------------------------------------|---------|-------------------------------------------|----------------|
| vcftools                                               | v0.1.13 | --minDP 3 --max-missing<br>0.2 --maf 0.05 | Filter SNP     |
| LEA                                                    | v3.6.0  | K = 1                                     | LFMM2 analysis |
| <b>Calculation of RONA and genomic offset</b>          |         |                                           |                |
| pyRona                                                 | v0.36   | -P 0.01                                   | RONA analysis  |
