# Supplementary material for: Haplotype-based pangenomes reveal genetic variations and climate adaptations in moso bamboo populations
Source: Springer Nature journal article supplement (doi:10.1038/s41467-024-52376-5), 2024-09-15
Supplement: 41467_2024_52376_MOESM3_ESM.pdf [file 41467_2024_52376_MOESM3_ESM.pdf]

## **Description of Additional Supplementary Files**

File Name: Supplementary Data 1

Description: Summary statistics of RNA-seq data from 186 samples.

File Name: Supplementary Data 2

Description: Summary of genome functional annotations.

File Name: Supplementary Data 3

Description: Summary statistics of genome assemblies for the 16 representative moso bamboo accessions.

File Name: Supplementary Data 4

Description: Summary statistics of identified SVs.

File Name: Supplementary Data 5

Description: List of LTR-related SVs.

File Name: Supplementary Data 6

Description: Estimated heterozygosity of short variations.

File Name: Supplementary Data 7

Description: List of core-single gene sets associated with environmental adaptations.

File Name: Supplementary Data 8

Description: Summary statistics of allele-specific expression (ASE).

File Name: Supplementary Data 9

Description: Gene set information of ASE.

File Name: Supplementary Data 10

Description: Summary statistics of consistent ASE genes.

File Name: Supplementary Data 11

Description: Summary statistics of inconsistent ASE genes.

File Name: Supplementary Data 12

Description: Nineteen bioclimatic variables across moso bamboo populations from the World Clim database.

File Name: Supplementary Data 13

Description: List of genomic variations detected by latent factor mixed model 2 (LFMM2).

File Name: Supplementary Data 14

Description: Summary statistics of climate-associated variations with BIO identified by LFMM2.

File Name: Supplementary Data 15

Description: RDA information of the candidate variations.

File Name: Supplementary Data 16

Description: List of genomic variations associated with bioclimatic variables.

File Name: Supplementary Data 17

Description: List of the 427 resequenced accessions from a previous study.

File Name: Supplementary Data 18

Description: List of duplicated genes.
